# Supplementary material for: The Impact of Nicotine along with Oral Contraceptive Exposure on Brain Fatty Acid Metabolism in Female Rats
Source: MDPI journal article supplement (doi:10.3390/ijms232416075), 2022-12-16

Supporting Information File:

Western Blots

# Adolescent cortex (AC) - AC1

- 8 gels/blots
  - 4 normal run time
  - 4 extended run/separation
- Same loading
- Homogenate from rt. cortex

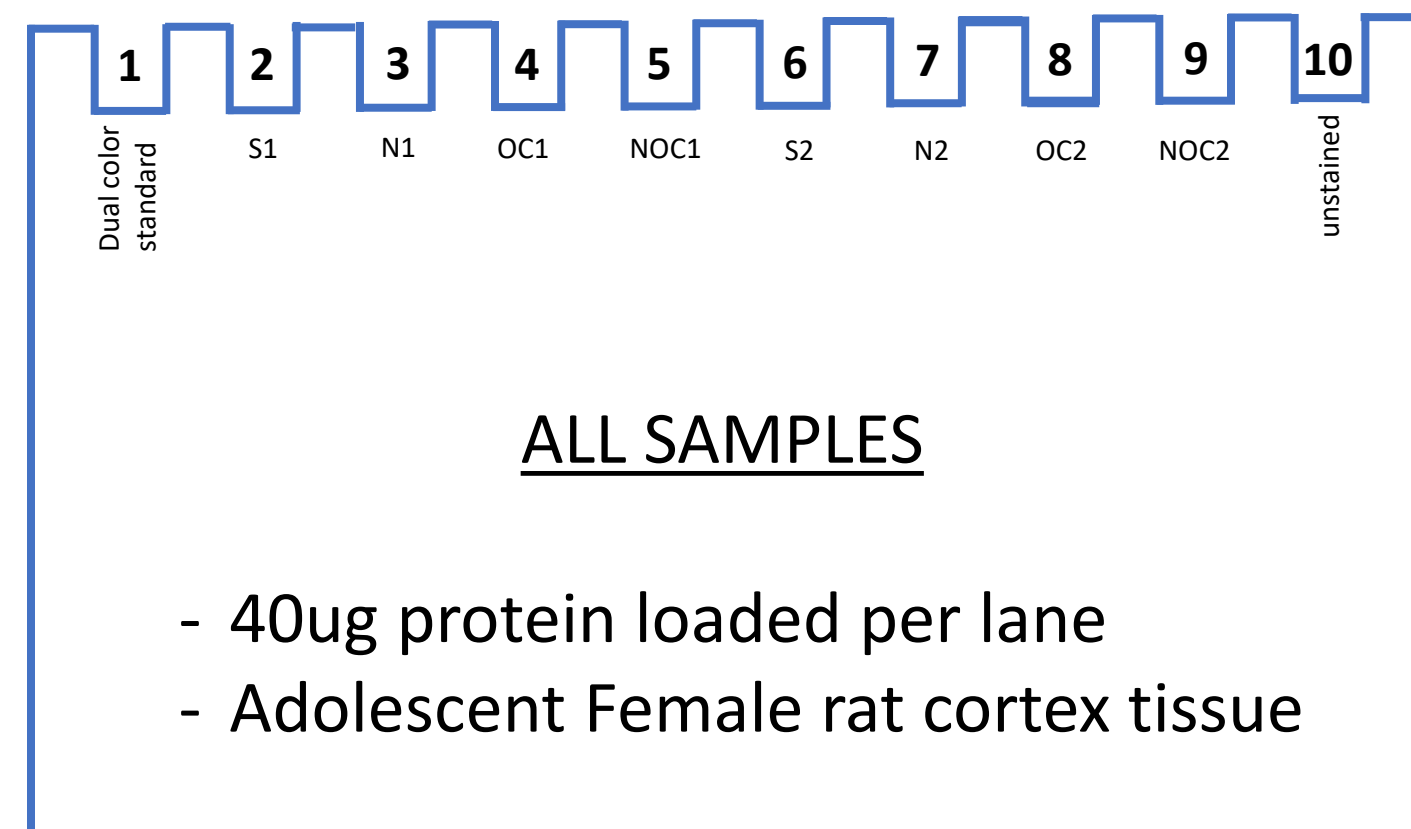

AC1

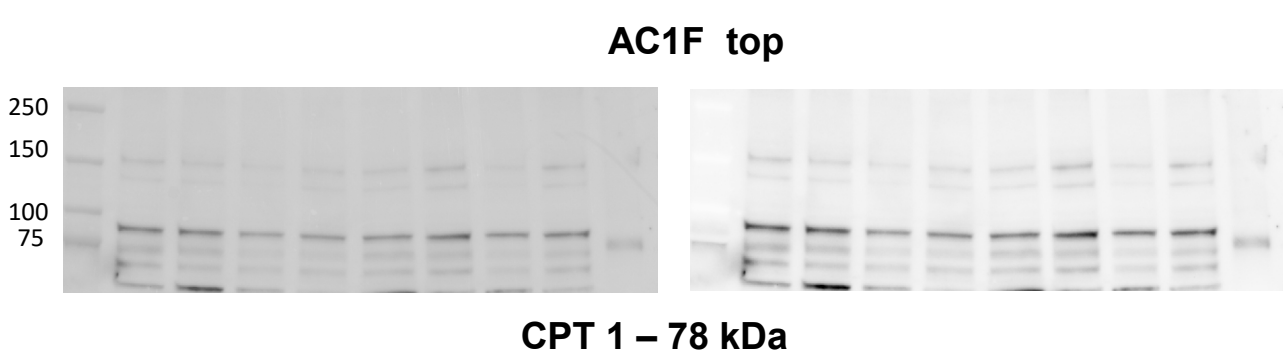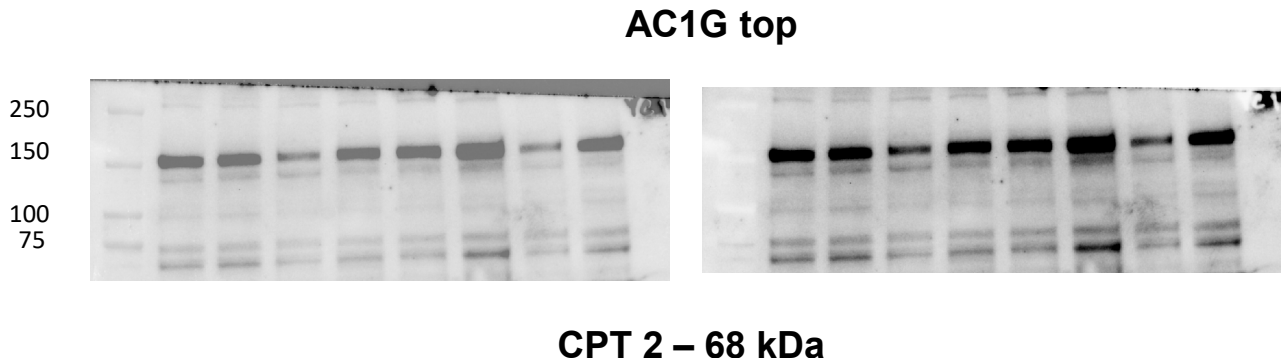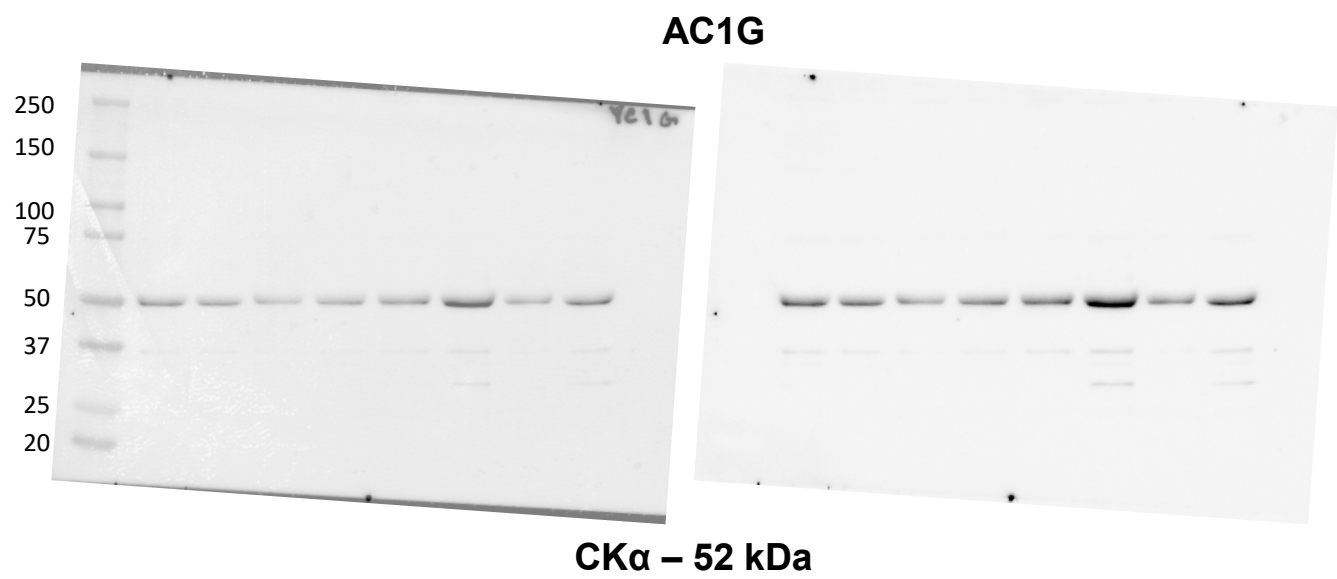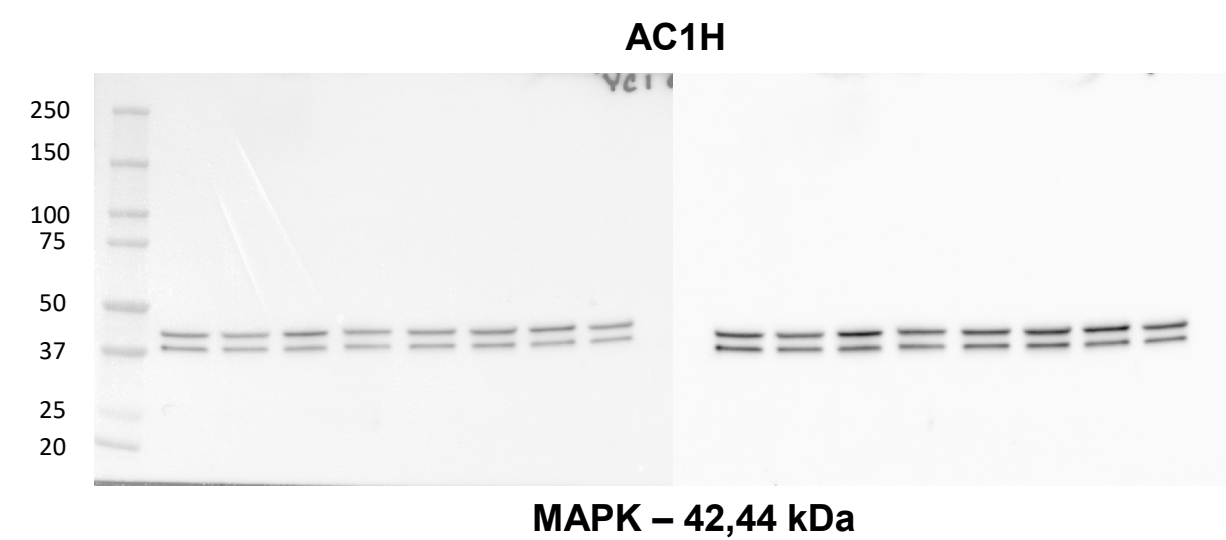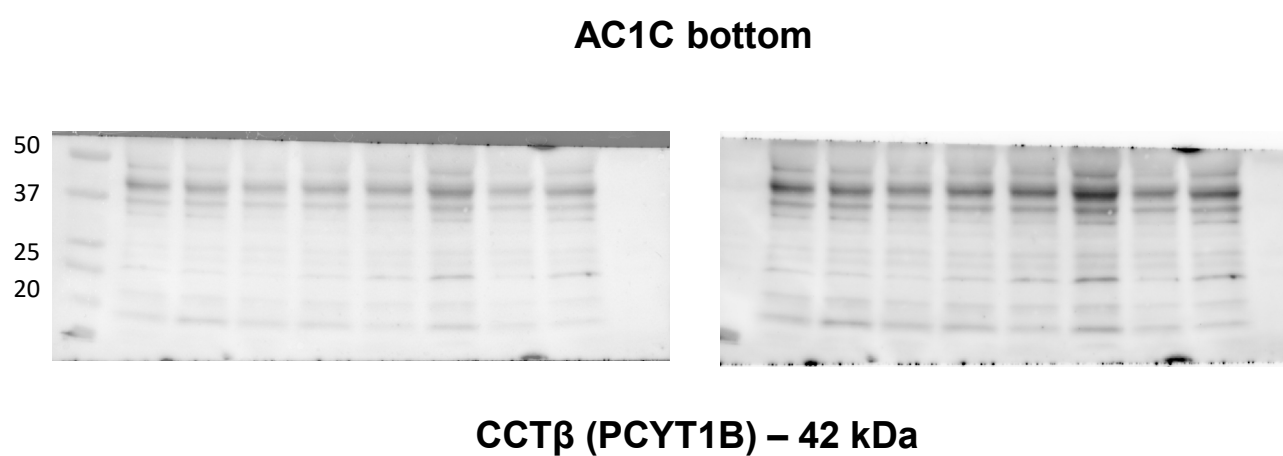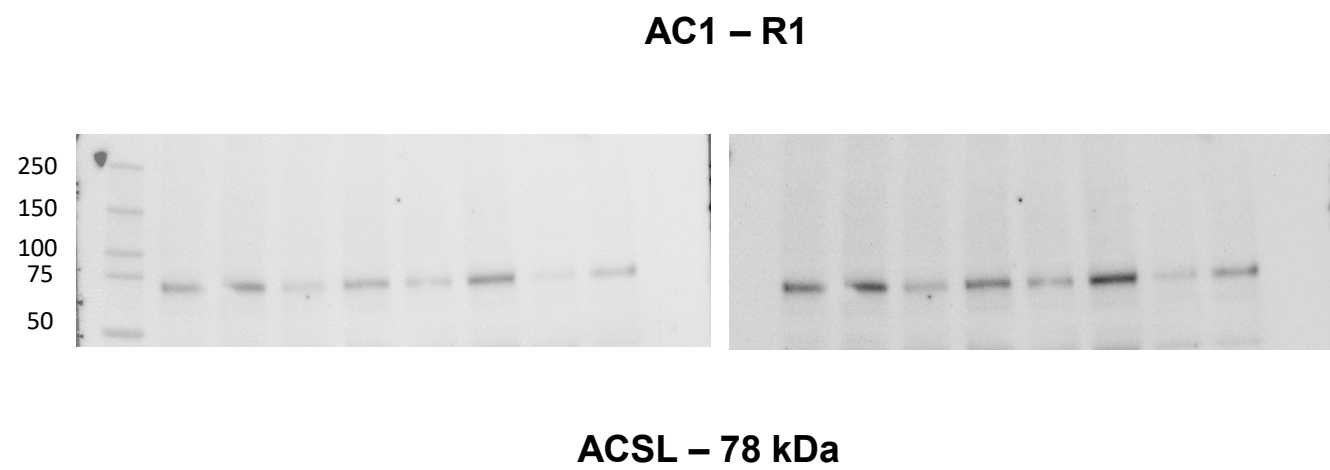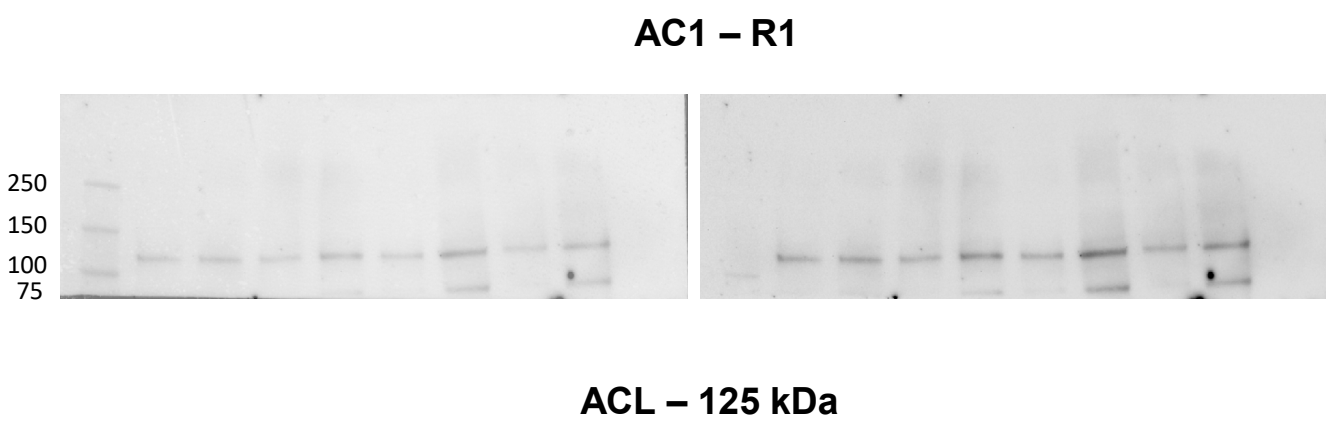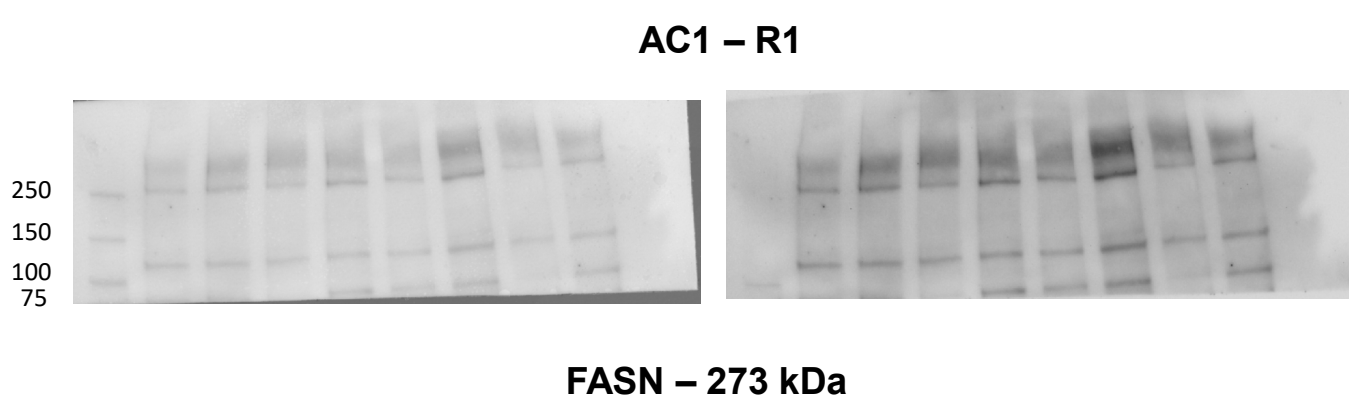

AC1 –  $\beta$ -actin Blots

AC1F

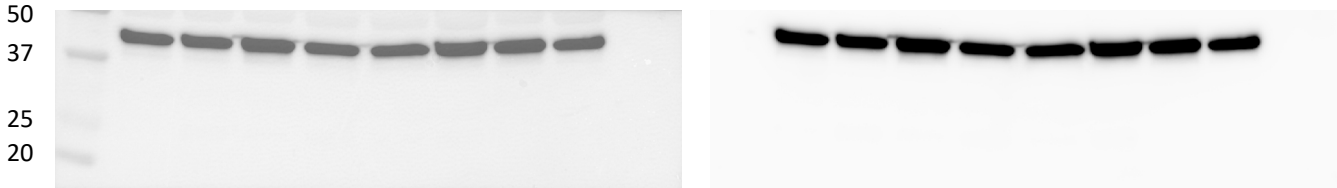

AC1C

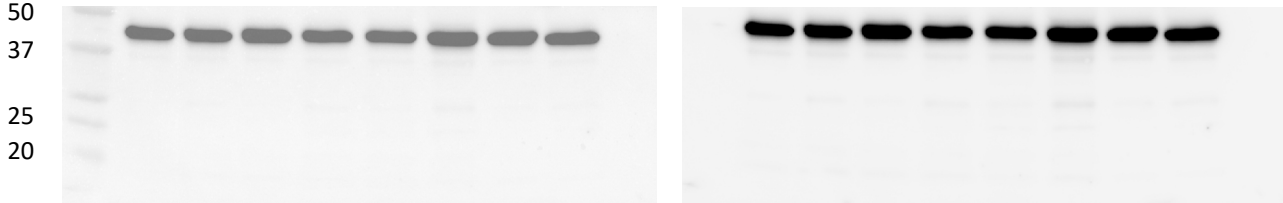

AC1G

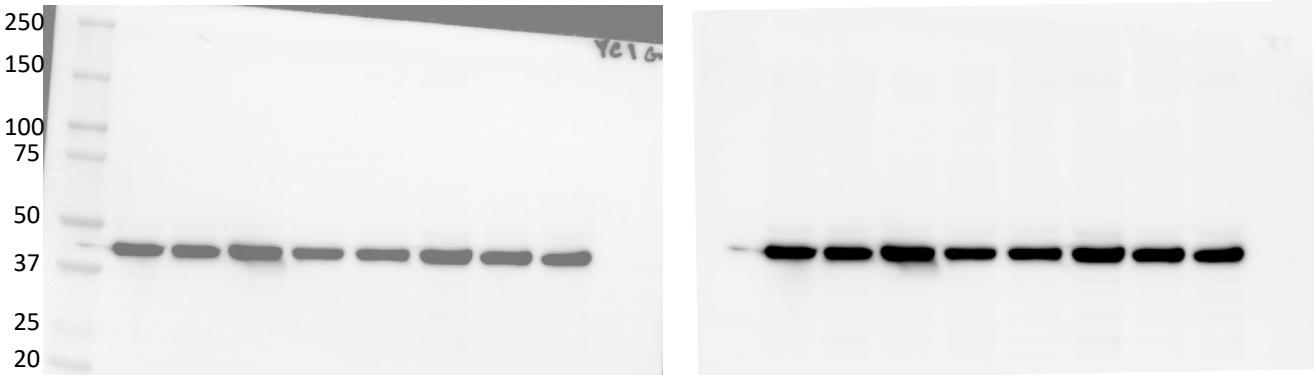

AC1H

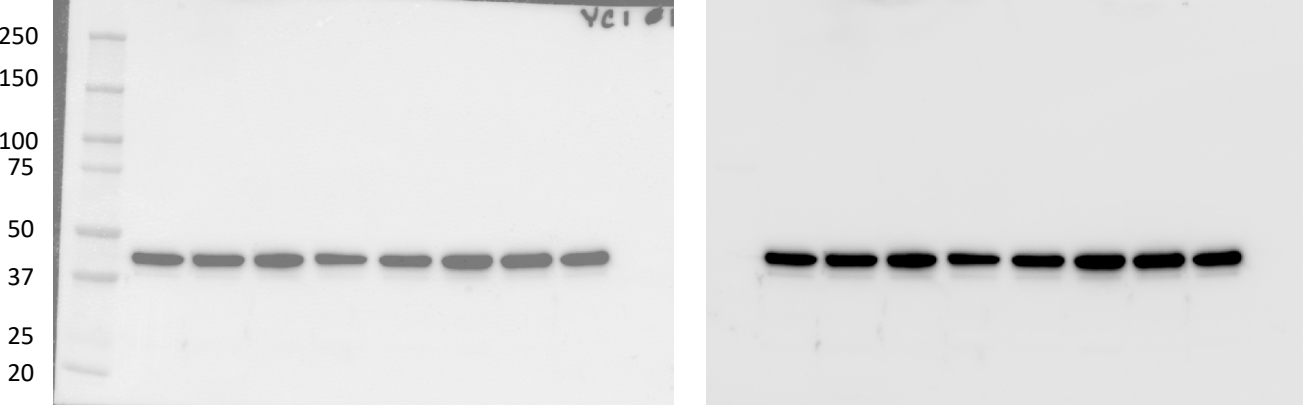

AC1 – R1

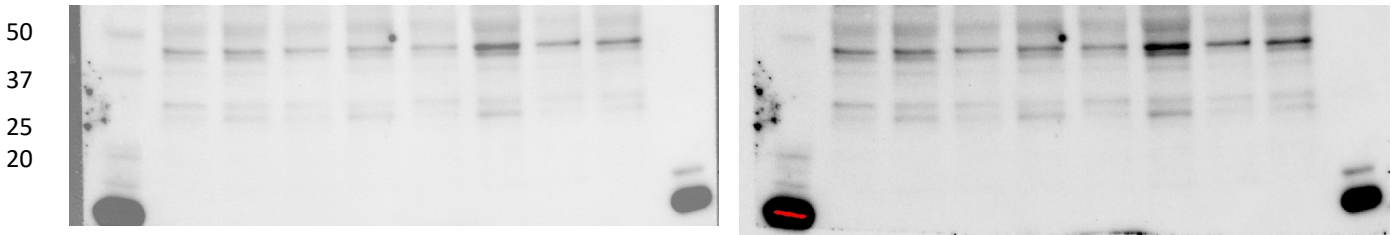

$\beta$ -Actin – 42 kDa

# Adolescent cortex (AC) – AC2

- 8 gels/blots
  - 4 normal run time
  - 4 extended run/separation
- Same loading
- Homogenate from rt. cortex

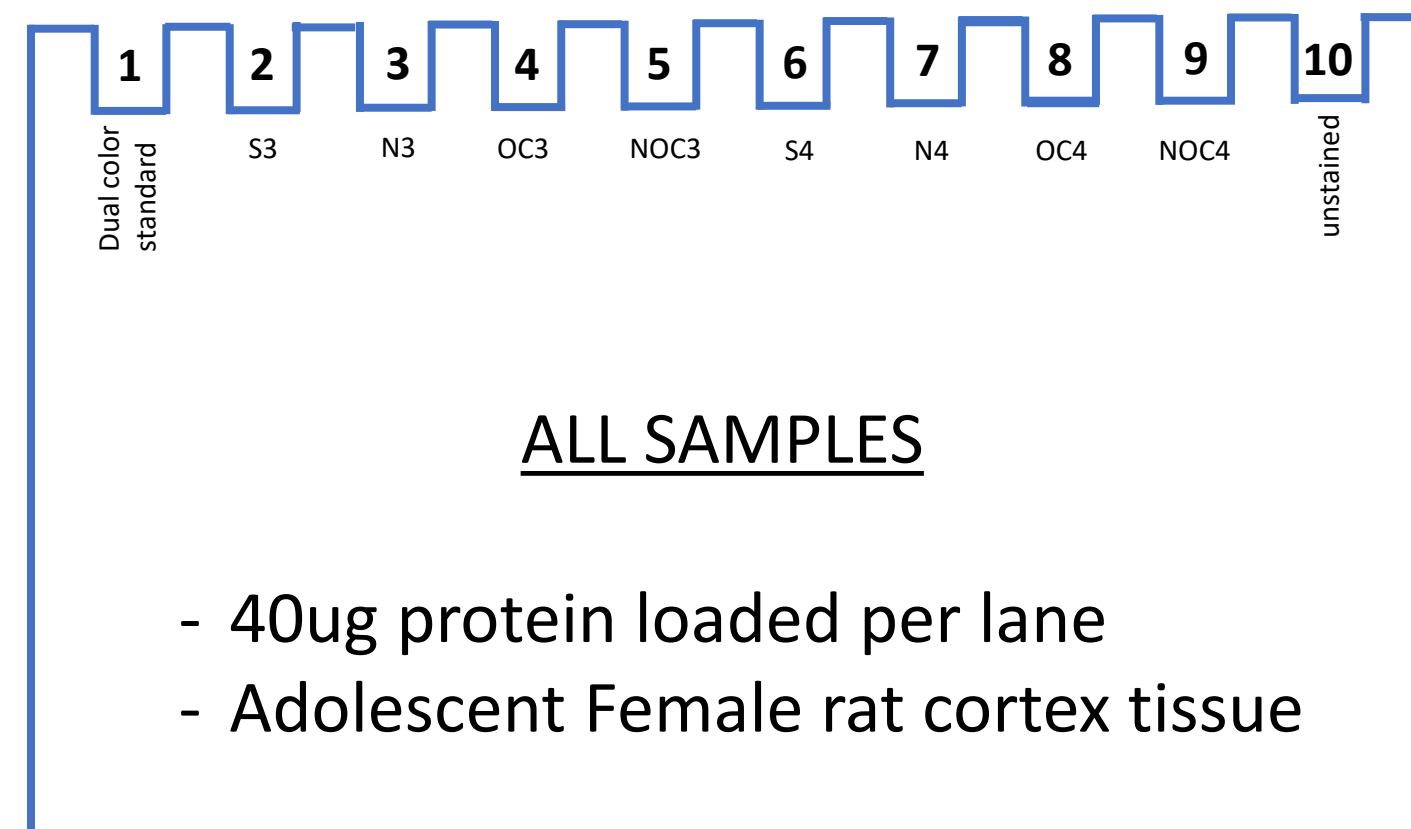

AC2

AC2F

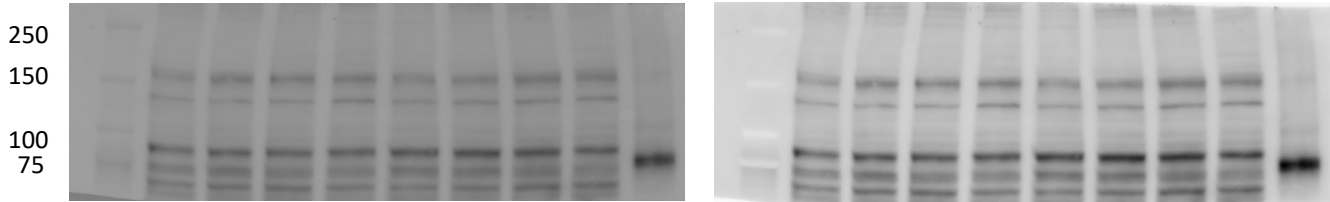

CPT 1 – 78 kDa

AC2E

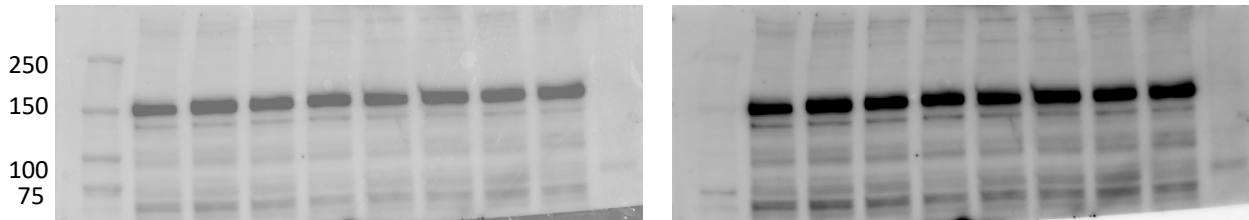

CPT 2 – 68 kDa

AC2A

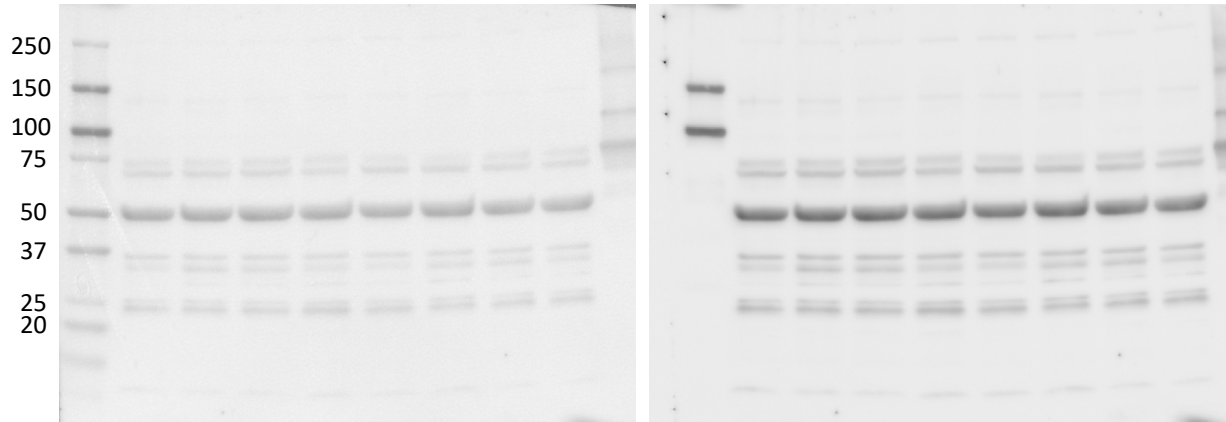

CKα – 52 kDa

AC2B

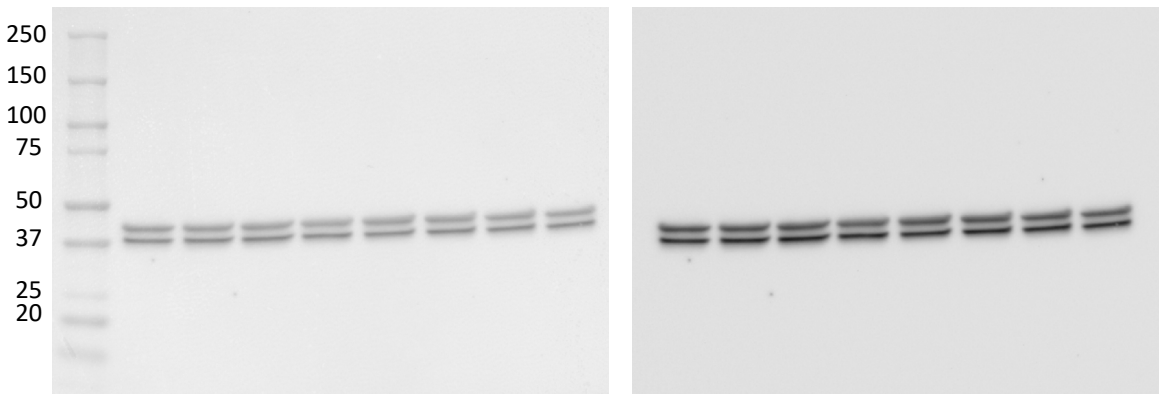

MAPK – 42,44 kDa

AC2H

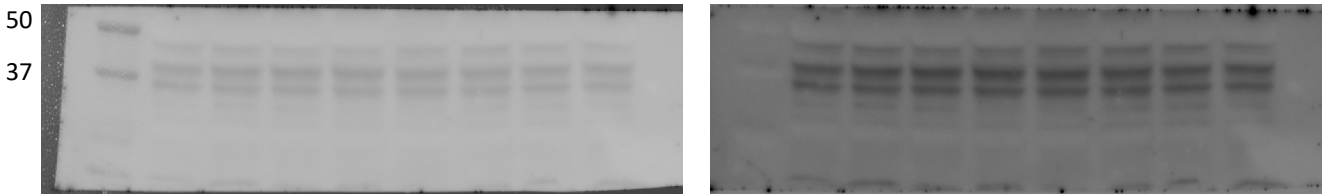

CCTβ (PCYT1B) – 42 kDa

AC2h – R2

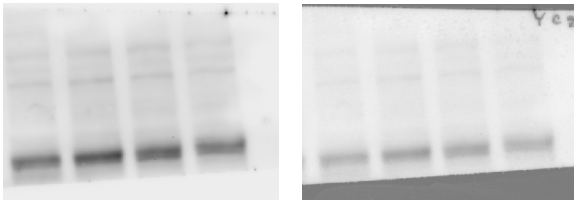

ACSL – 78 kDa

AC2 – R1

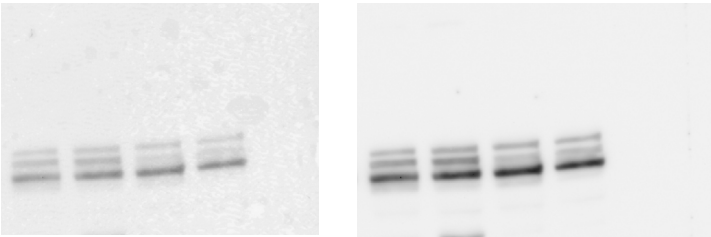

MLCD – 55 kDa

AC2 – R1

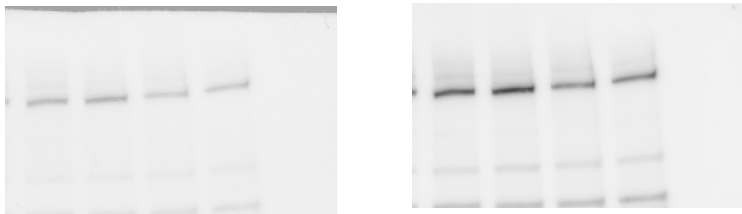

FASN – 273 kDa

AC2 – R1

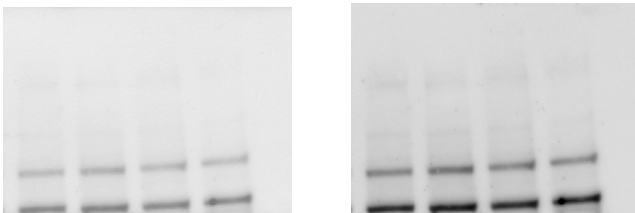

ACL – 125 kDa

AC2 –  $\beta$ -actin Blots

AC2A

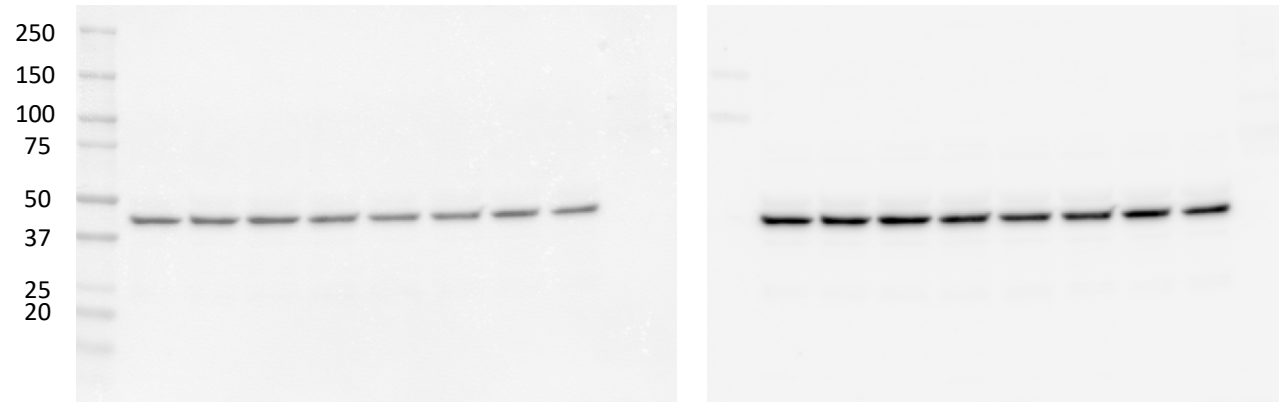

AC2B

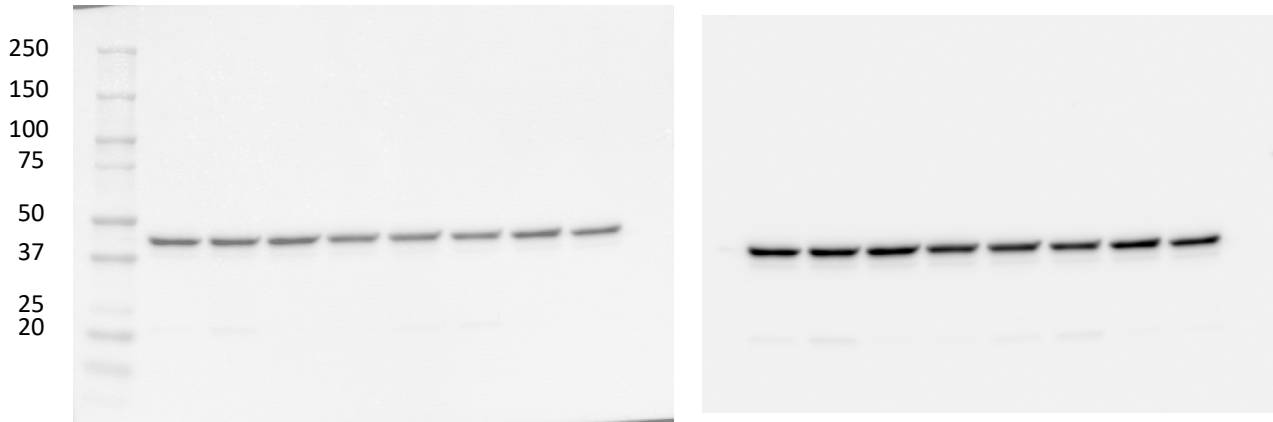

AC2E

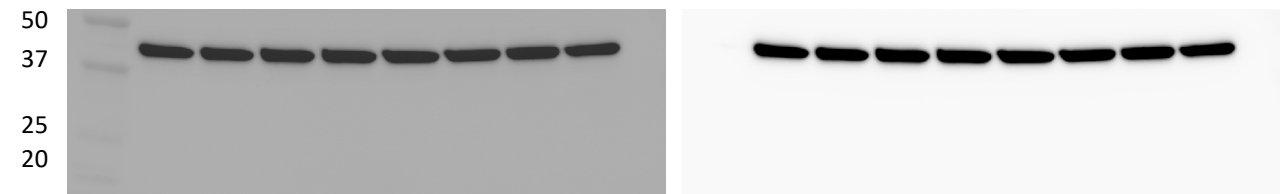

AC2F

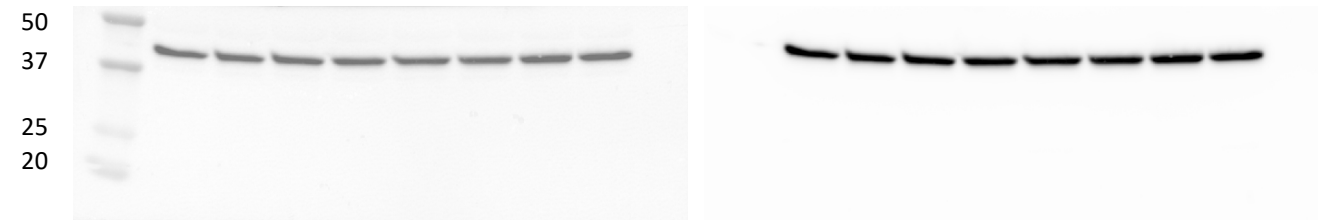

AC2H

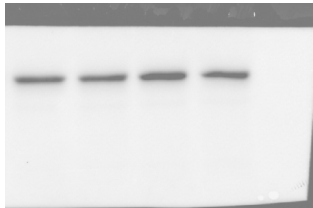

AC2 – R1

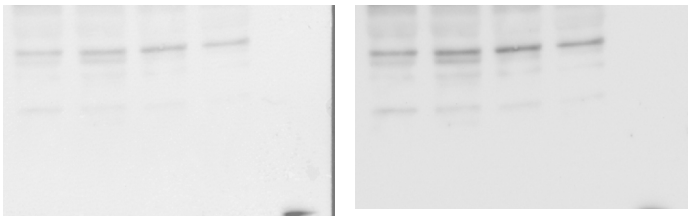

AC2 – R2

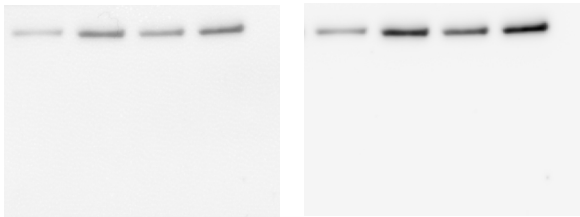

# Adolescent cortex (AC) – AC3

- 8 gels/blots
  - 4 normal run time
  - 4 extended run/separation
- Same loading
- Homogenate from rt. cortex

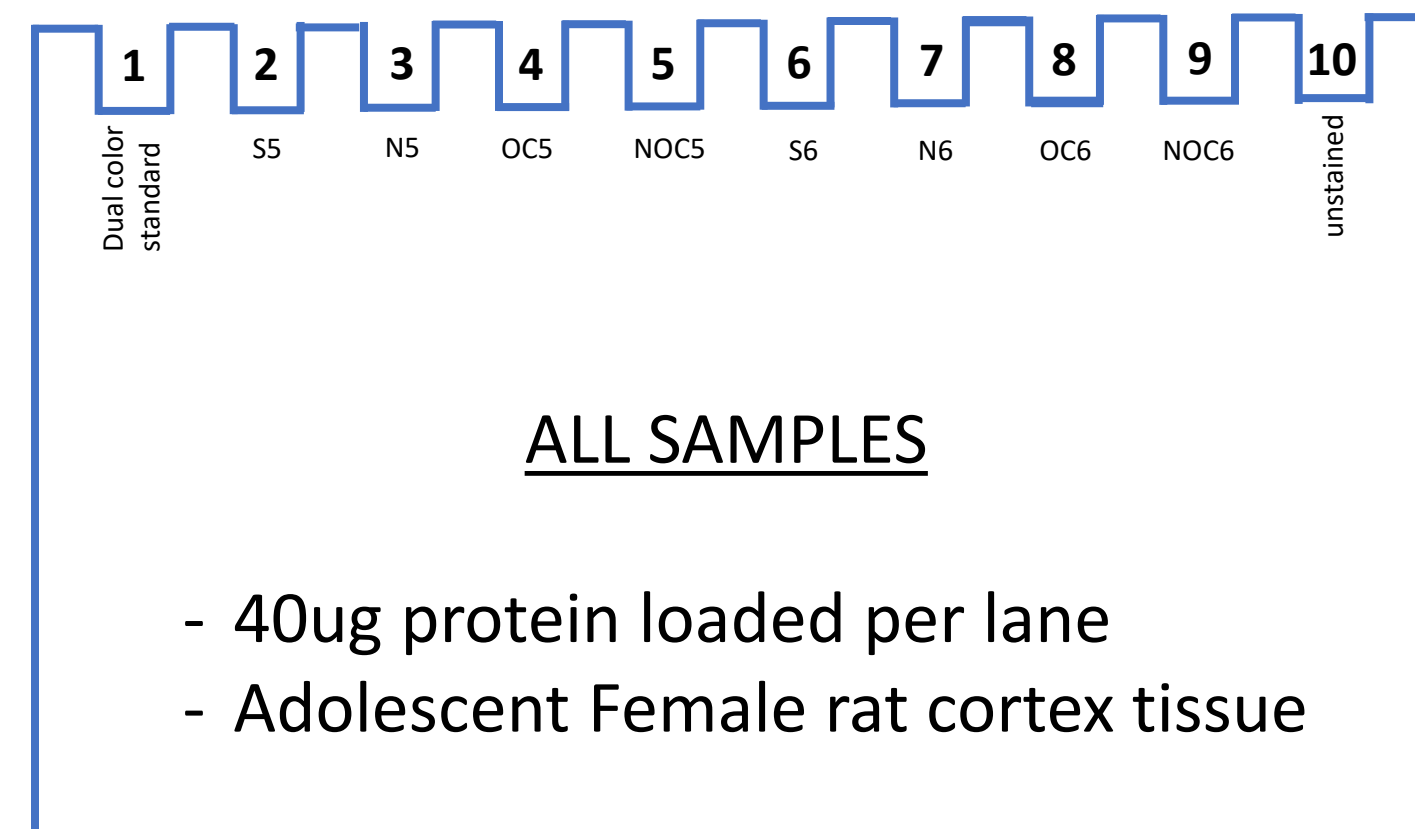

AC3

AC3G

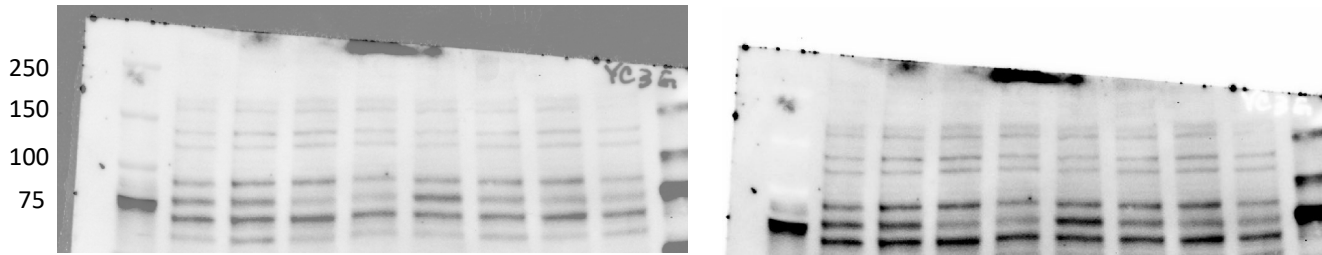

AC3N top

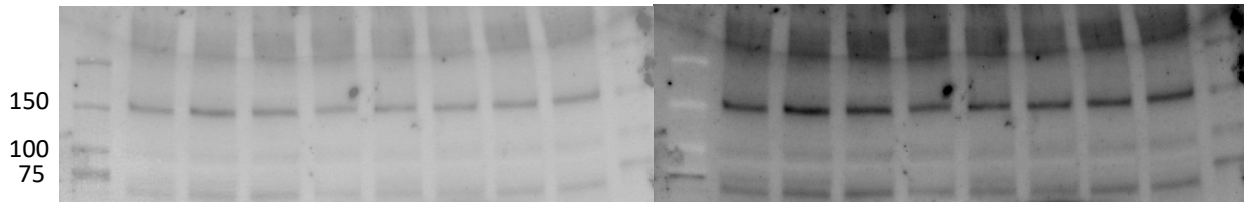

CPT 1 – 78 kDa

AC3E bottom

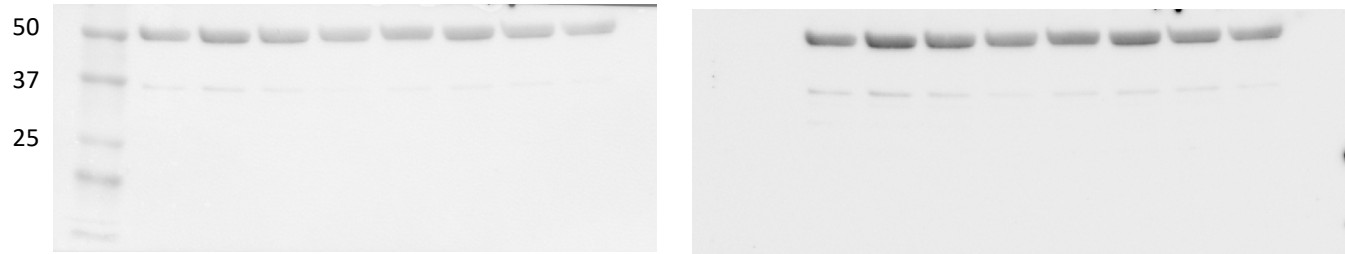

CPT 2 – 68 kDa

AC3F bottom

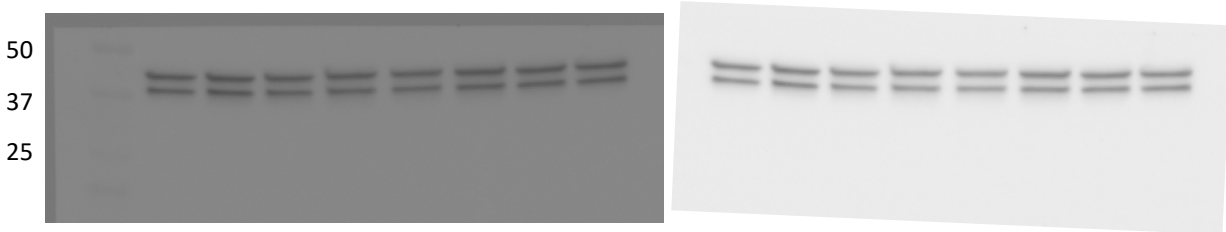

CKα – 52 kDa

MAPK – 42,44 kDa

AC3Nb

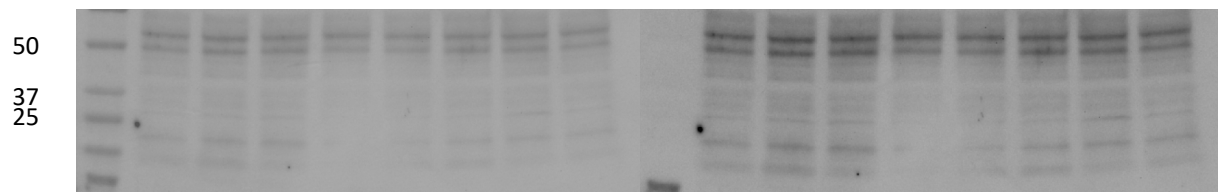

CCTβ (PCYT1B) – 42 kDa

AC3 –  $\beta$ -actin Blots

AC3E

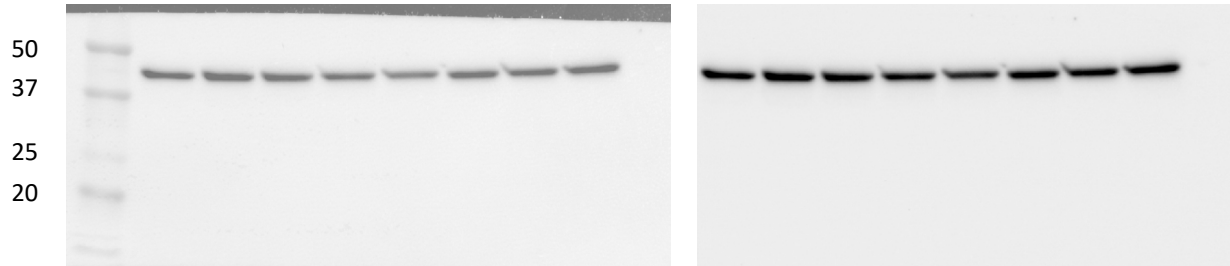

AC3F

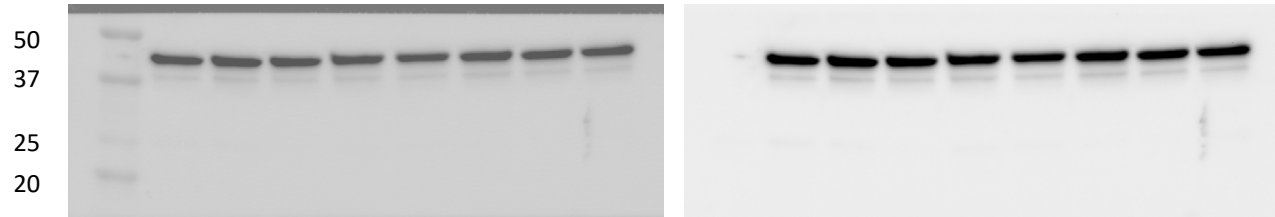

AC3D

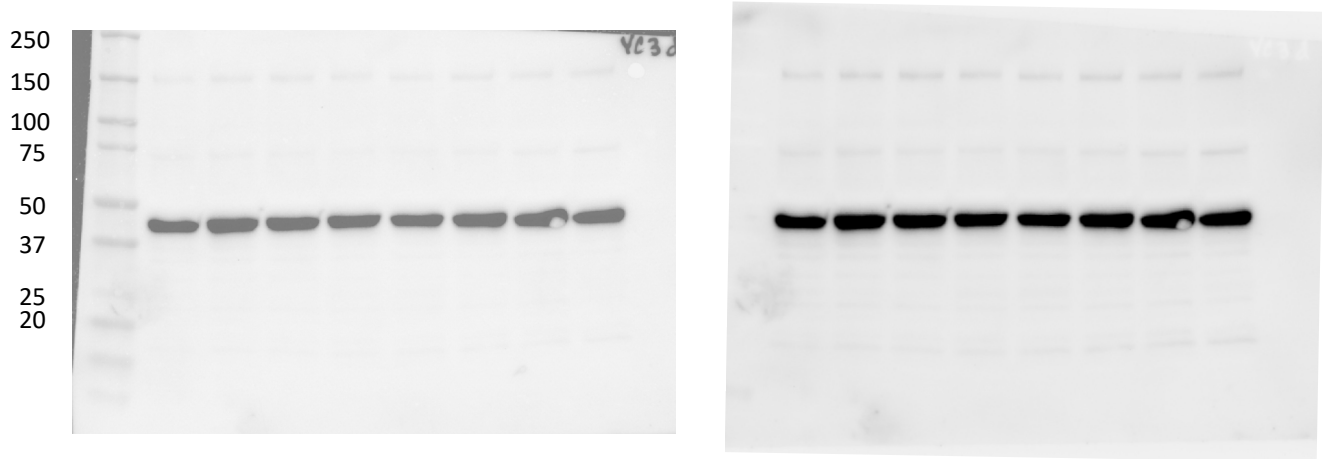

AC3G

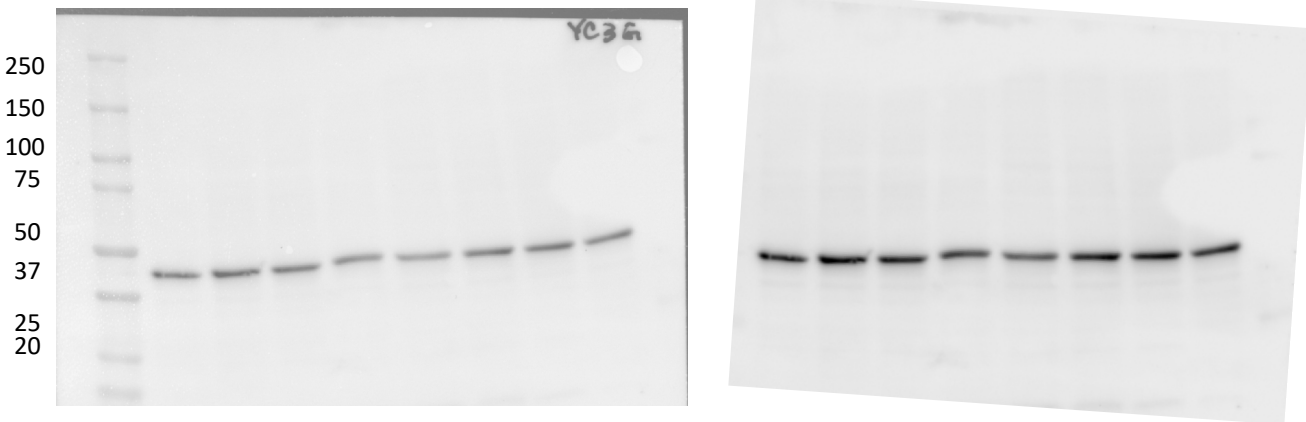

AC3N

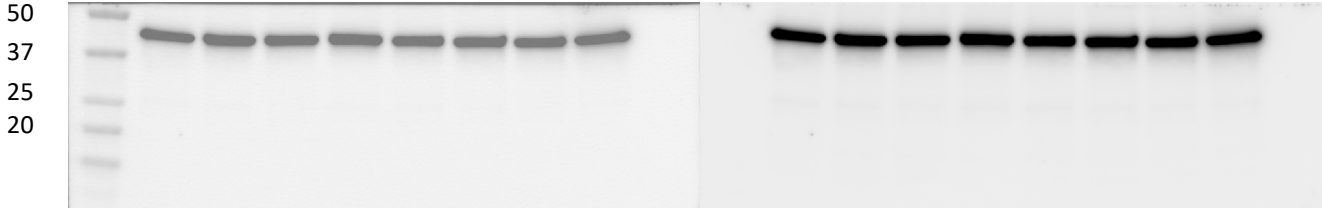

# Adolescent cortex (AC) – AC4

- 8 gels/blots
  - 4 normal run time
  - 4 extended run/separation
- Same loading
- Homogenate from rt. cortex

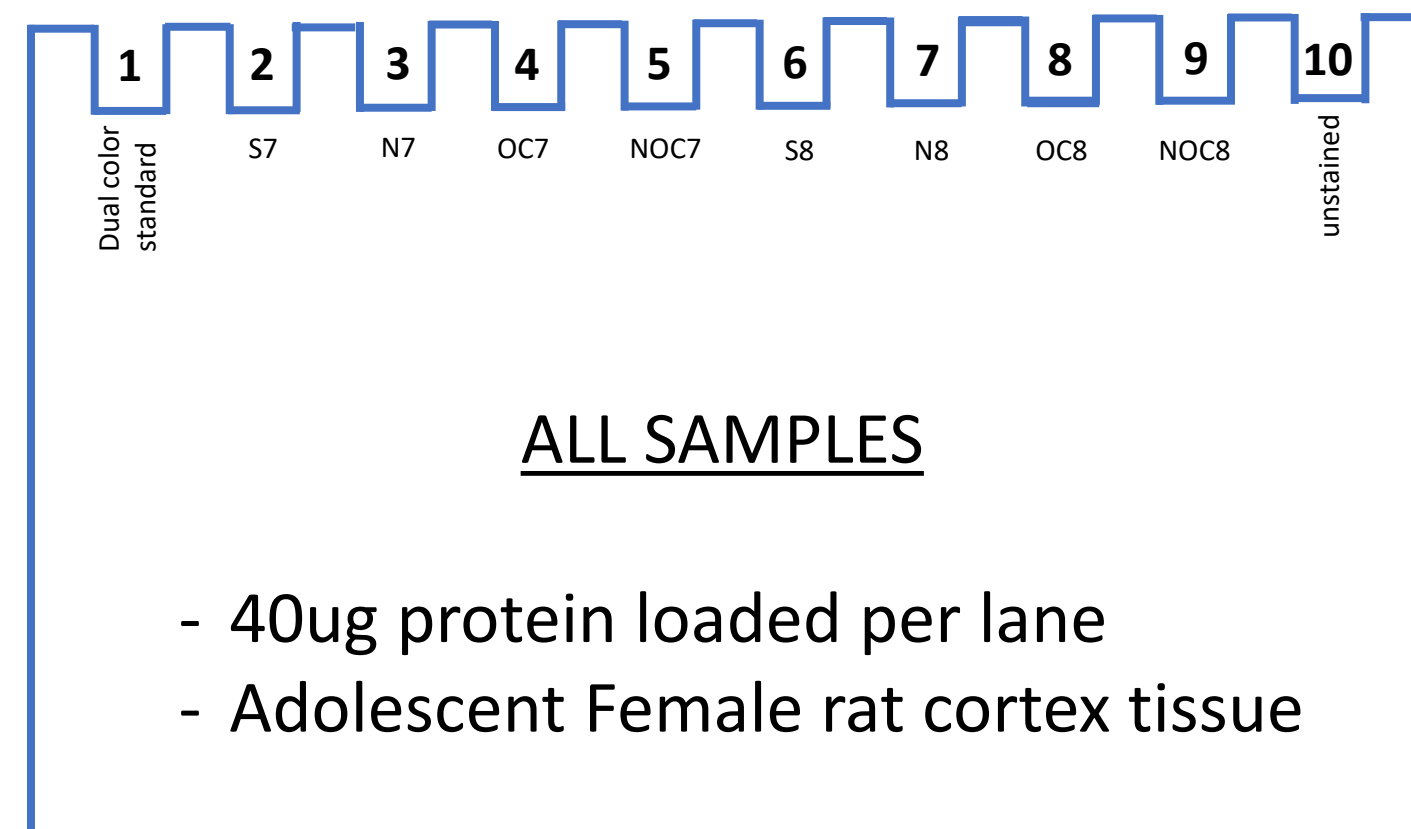

AC4

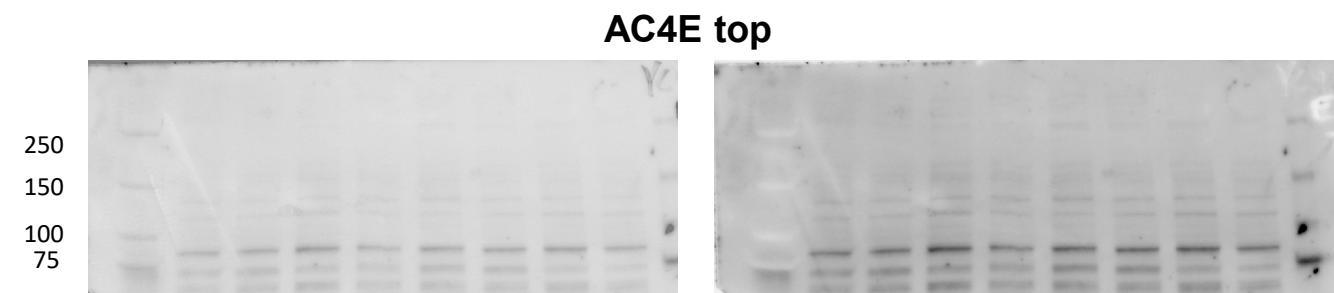

CPT 1 – 78 kDa

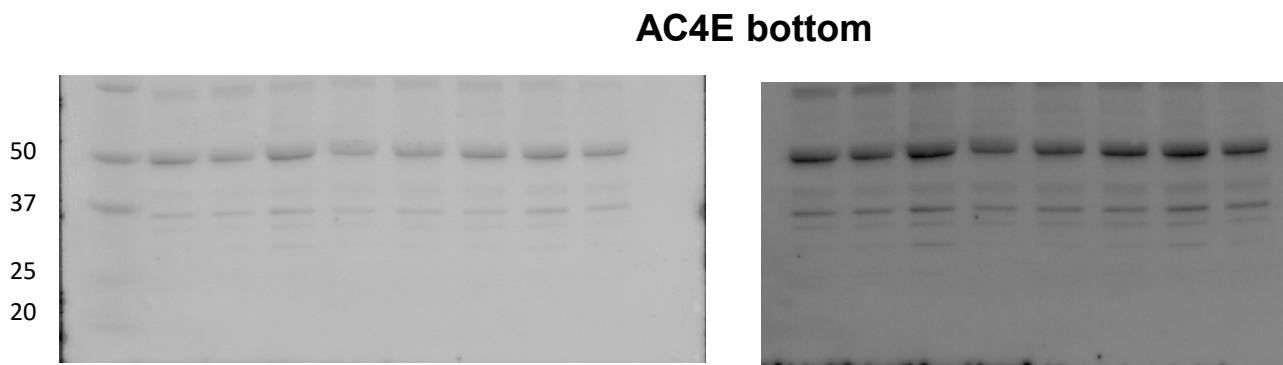

CK $\alpha$  – 52 kDa

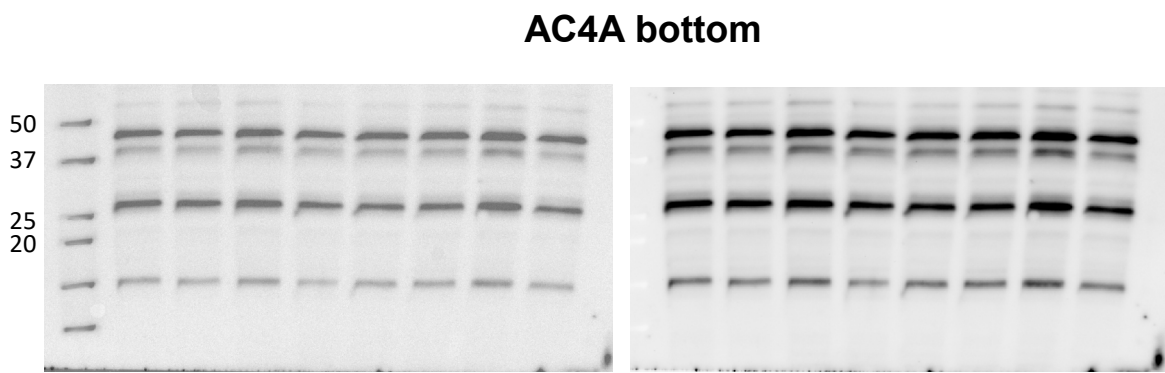

CCT $\beta$  (PCYT1B) – 42 kDa

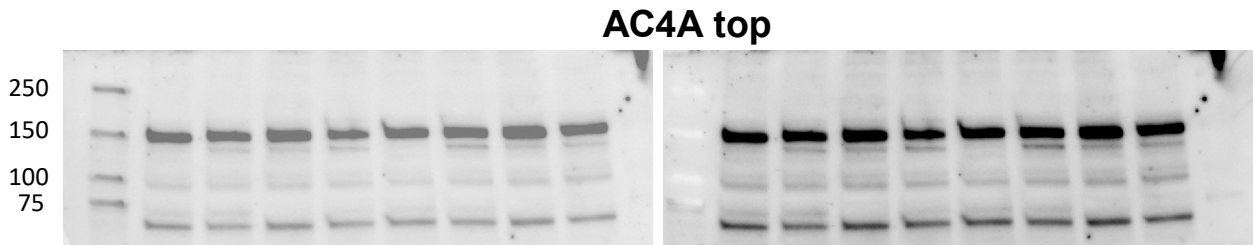

CPT 2 – 68 kDa

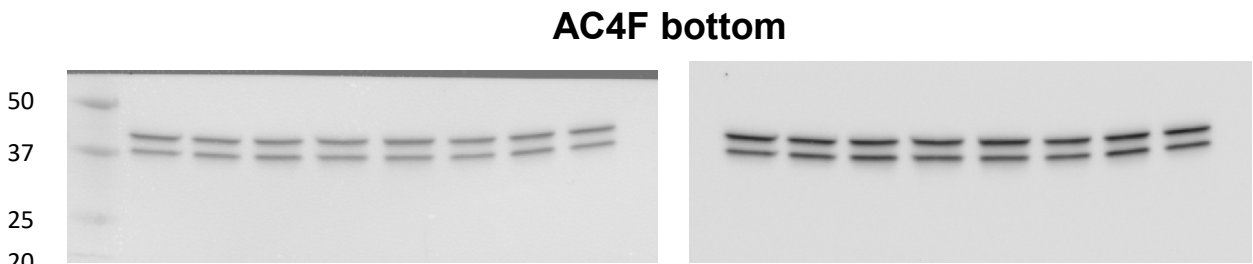

MAPK – 42,44 kDa

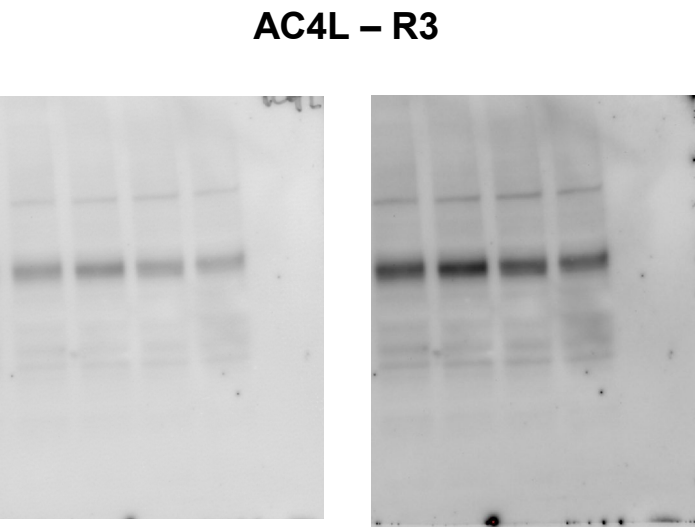

ACSL – 78 kDa

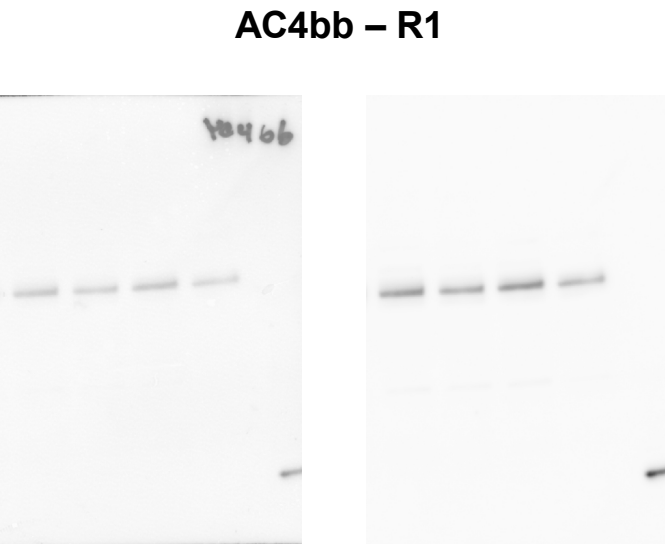

MLCD – 55 kDa

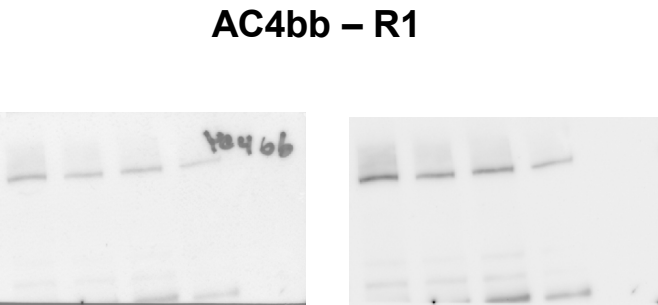

FASN – 273 kDa

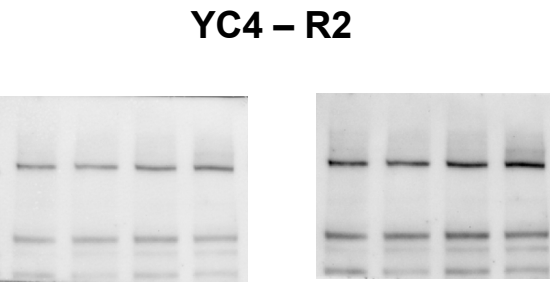

ACL – 125 kDa

AC4 –  $\beta$ -actin Blots

AC4A

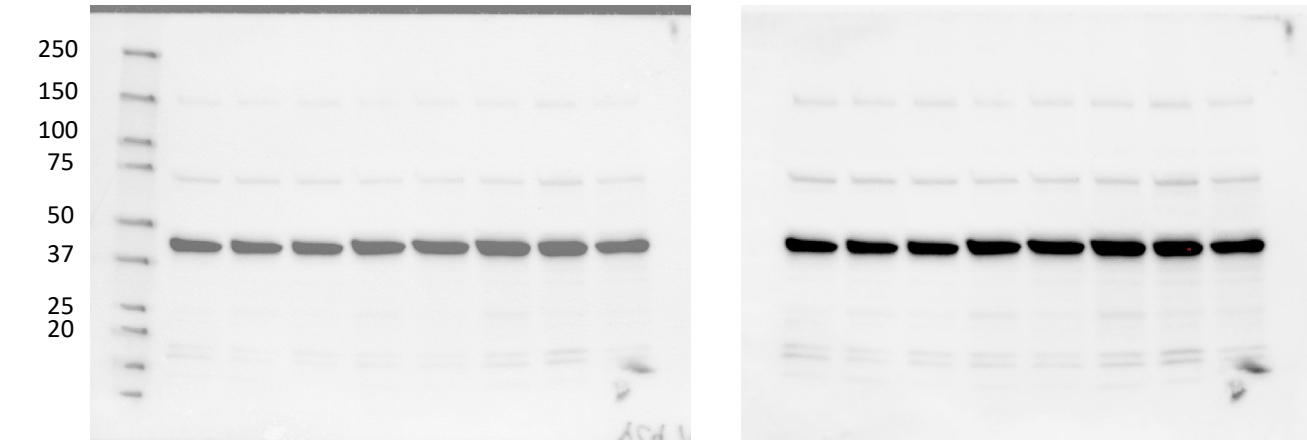

AC4B

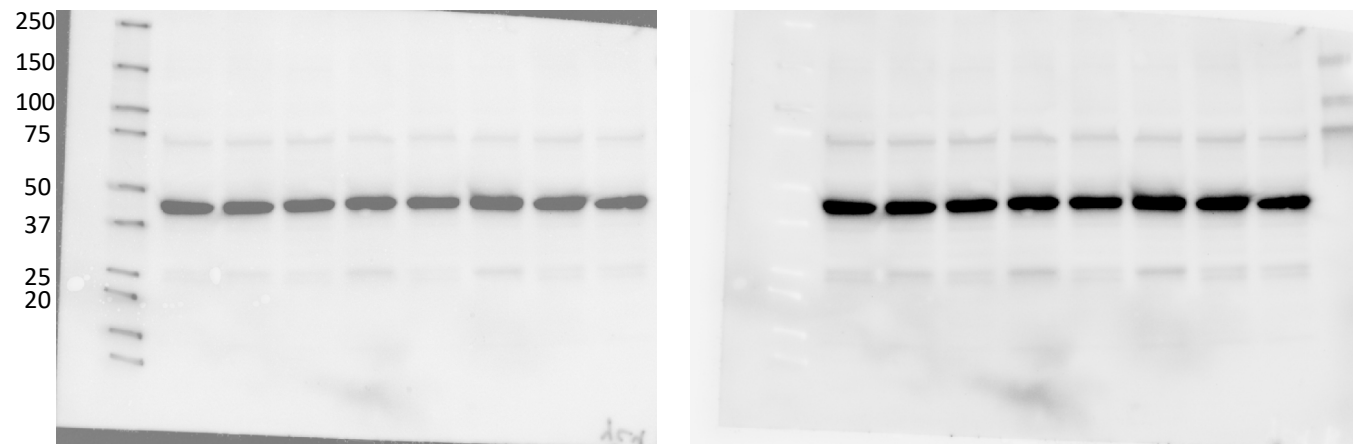

AC4G

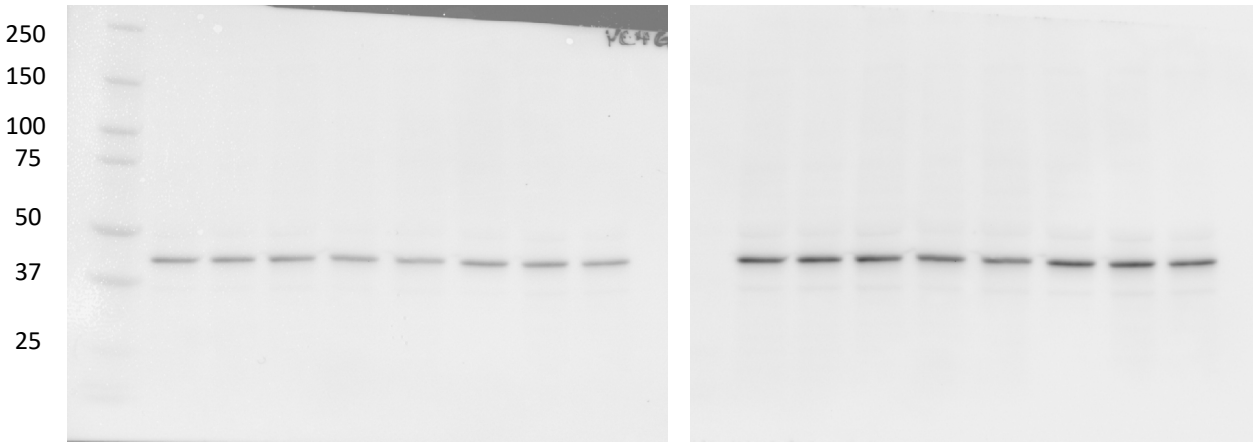

AC4E

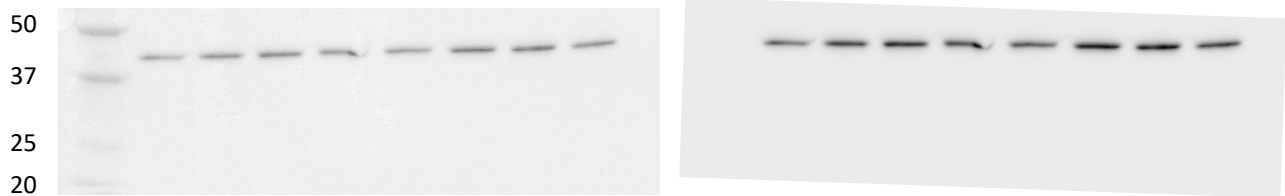

AC4F

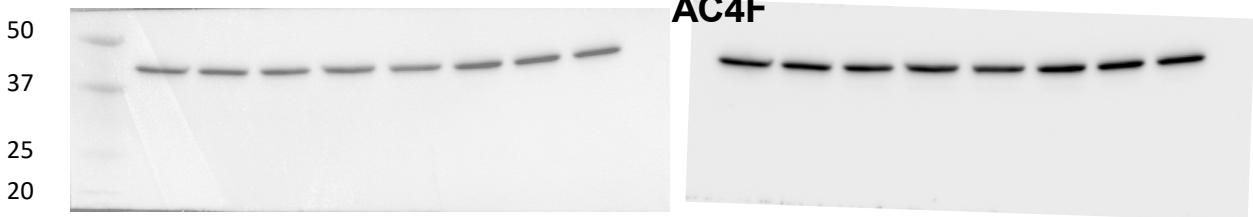

AC4L – R3

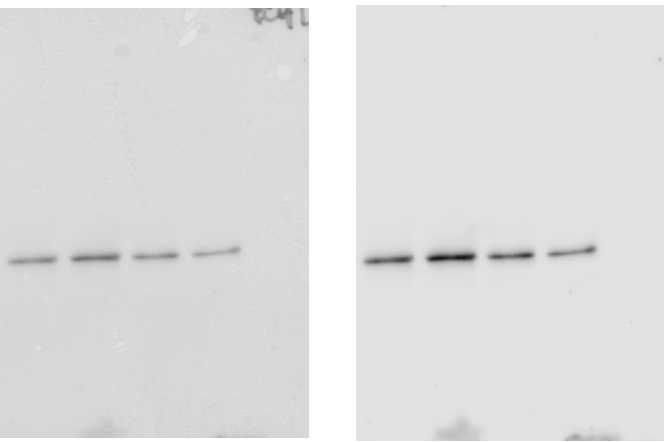

AC4bb – R1

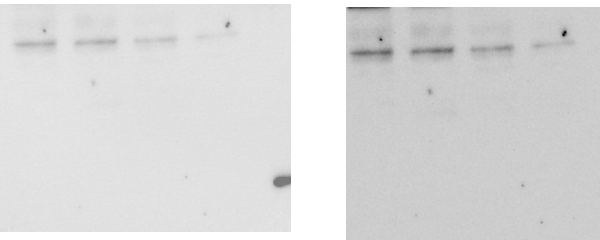

AC4 – R2

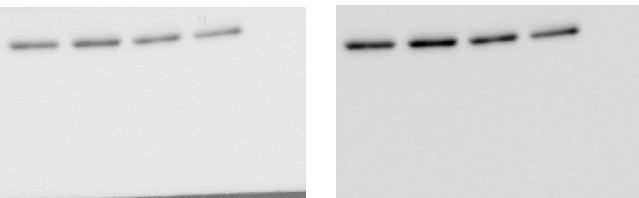

Supplement: s1 [file s1]
