# Supplementary material for: The Impact of Nicotine along with Oral Contraceptive Exposure on Brain Fatty Acid Metabolism in Female Rats
Source: MDPI journal article supplement (doi:10.3390/ijms232416075), 2022-12-16
Supplement: s1 [file s1]

## Supplementary Tables:

### Supplementary Table S1a. Fatty Acid Synthesis and Long Chain Fatty Acid

metabolites in the Cortex of Adolescent Female Rats

| Metabolites                | Nicotine (N) /saline (S) |         |         | Oral contraceptives (OC)/S |         |         | N + OC / S  |         |         | N + OC / N |         |         | N + OC / OC |         |         |
|----------------------------|--------------------------|---------|---------|----------------------------|---------|---------|-------------|---------|---------|------------|---------|---------|-------------|---------|---------|
|                            | N/S                      | p-value | q-value | OC/S                       | p-value | q-value | N+OC S      | p-value | q-value | N+OC/N     | p-value | q-value | N+OC/OC     | p-value | q-value |
| malonylcarnitine           | <b>1.18</b>              | 0.0537  | 0.2123  | 1.10                       | 0.3439  | 0.5969  | <b>1.25</b> | 0.0139  | 0.0544  | 1.05       | 0.5723  | 0.9995  | 1.14        | 0.1188  | 0.4562  |
| malonate                   | 0.99                     | 0.7765  | 0.7410  | 0.94                       | 0.5120  | 0.6719  | <b>0.84</b> | 0.0608  | 0.1441  | 0.85       | 0.1091  | 0.8704  | 0.90        | 0.2152  | 0.5268  |
| acetyl CoA                 | 1.19                     | 0.1787  | 0.3754  | 1.08                       | 0.7988  | 0.7438  | 1.18        | 0.3096  | 0.3929  | 0.99       | 0.7376  | 0.9996  | 1.09        | 0.4450  | 0.6754  |
| myristate (14:0)           | 1.02                     | 0.7515  | 0.7329  | 1.05                       | 0.2837  | 0.5779  | 1.00        | 0.8975  | 0.7187  | 0.98       | 0.6561  | 0.9996  | 0.95        | 0.2307  | 0.5268  |
| palmitate (16:0)           | <b>1.17</b>              | 0.0663  | 0.2190  | <b>1.17</b>                | 0.0710  | 0.3425  | 1.14        | 0.1242  | 0.2407  | 0.98       | 0.7562  | 0.9996  | 0.97        | 0.7807  | 0.7656  |
| palmitoleate (16:1n7)      | 1.07                     | 0.4030  | 0.5581  | 0.96                       | 0.6297  | 0.7094  | 1.11        | 0.2031  | 0.3162  | 1.04       | 0.6581  | 0.9996  | <b>1.16</b> | 0.0817  | 0.4035  |
| margarate (17:0)           | <b>1.14</b>              | 0.0219  | 0.1273  | <b>1.17</b>                | 0.0110  | 0.1397  | <b>1.20</b> | 0.0032  | 0.0218  | 1.05       | 0.4733  | 0.9444  | 1.03        | 0.6548  | 0.7439  |
| 10-heptadecenoate (17:1n7) | 1.10                     | 0.4158  | 0.5700  | 0.99                       | 0.9489  | 0.7685  | 1.14        | 0.2200  | 0.3347  | 1.04       | 0.6757  | 0.9996  | 1.15        | 0.1973  | 0.5120  |
| stearate (18:0)            | <b>1.17</b>              | 0.0684  | 0.2207  | <b>1.30</b>                | 0.0089  | 0.1314  | <b>1.22</b> | 0.0575  | 0.1420  | 1.04       | 0.9351  | 0.9996  | 0.94        | 0.4435  | 0.6754  |
| oleate/vaccenate (18:1)    | 1.16                     | 0.1937  | 0.3858  | 1.09                       | 0.4676  | 0.6443  | 1.14        | 0.1959  | 0.3108  | 0.98       | 0.9949  | 0.9996  | 1.05        | 0.5658  | 0.7078  |
| nonadecanoate (19:0)       | 1.06                     | 0.4956  | 0.6188  | <b>1.16</b>                | 0.0631  | 0.3186  | 1.05        | 0.7108  | 0.6646  | 0.99       | 0.7552  | 0.9996  | 0.90        | 0.1333  | 0.4699  |
| 10-nonadecenoate (19:1n9)  | <b>1.18</b>              | 0.0687  | 0.2207  | 1.12                       | 0.2144  | 0.5434  | 1.09        | 0.2710  | 0.3720  | 0.92       | 0.4596  | 0.9444  | 0.97        | 0.8860  | 0.7872  |
| arachidate (20:0)          | 1.15                     | 0.2625  | 0.4375  | <b>1.38</b>                | 0.0099  | 0.1323  | 1.08        | 0.5875  | 0.6005  | 0.94       | 0.5600  | 0.9936  | <b>0.78</b> | 0.0379  | 0.2704  |
| eicosenoate (20:1)         | 1.09                     | 0.2411  | 0.4197  | 1.06                       | 0.4719  | 0.6449  | 1.00        | 0.7745  | 0.6792  | 0.92       | 0.3736  | 0.9096  | 0.94        | 0.6642  | 0.7439  |
| erucate (22:1n9)           | 1.22                     | 0.1532  | 0.3446  | <b>1.29</b>                | 0.0794  | 0.3627  | 0.98        | 0.8367  | 0.7034  | 0.80       | 0.2198  | 0.8760  | 0.76        | 0.1199  | 0.4562  |

### Supplementary Table S1b. Fatty Acid Synthesis and Long Chain Fatty Acid

metabolites in the Cortex of Adult Female Rats

| Metabolites                | Nicotine (N) /saline (S) |         |         | Oral contraceptives (OC)/S |         |         | N + OC / S  |         |         | N + OC / N  |         |         | N + OC / OC |         |         |
|----------------------------|--------------------------|---------|---------|----------------------------|---------|---------|-------------|---------|---------|-------------|---------|---------|-------------|---------|---------|
|                            | N/S                      | p-value | q-value | OC/S                       | p-value | q-value | N+OC S      | p-value | q-value | N+OC/N      | p-value | q-value | N+OC/OC     | p-value | q-value |
| malonylcarnitine           | <b>1.16</b>              | 0.0853  | 0.4469  | 1.09                       | 0.3035  | 0.8021  | <b>1.15</b> | 0.0980  | 0.2265  | 0.99        | 0.9449  | 0.6519  | 1.02        | 0.5222  | 0.5102  |
| malonate                   | 1.04                     | 0.5900  | 0.7530  | 0.87                       | 0.1490  | 0.5897  | 1.06        | 0.4758  | 0.4815  | 1.02        | 0.8610  | 0.6356  | <b>1.23</b> | 0.0334  | 0.1100  |
| acetyl CoA                 | 0.84                     | 0.2245  | 0.5988  | 0.97                       | 0.8298  | 0.9974  | 1.21        | 0.1907  | 0.3143  | <b>1.44</b> | 0.0134  | 0.0898  | <b>1.39</b> | 0.1291  | 0.2543  |
| myristate (14:0)           | 1.04                     | 0.4268  | 0.6792  | 1.07                       | 0.1213  | 0.5255  | <b>1.11</b> | 0.0268  | 0.1177  | 1.07        | 0.1460  | 0.2831  | 1.06        | 0.4859  | 0.4921  |
| palmitate (16:0)           | 1.04                     | 0.7985  | 0.7880  | <b>1.20</b>                | 0.0581  | 0.4320  | 1.17        | 0.1076  | 0.2378  | 1.12        | 0.1735  | 0.3087  | 0.98        | 0.7660  | 0.5919  |
| palmitoleate (16:1n7)      | 0.92                     | 0.3143  | 0.6390  | 0.96                       | 0.5892  | 0.9562  | 1.09        | 0.5529  | 0.5113  | 1.19        | 0.1125  | 0.2601  | 0.99        | 0.2591  | 0.3587  |
| margarate (17:0)           | 1.01                     | 0.9430  | 0.8286  | <b>1.16</b>                | 0.0186  | 0.2887  | <b>1.19</b> | 0.0058  | 0.0534  | <b>1.18</b> | 0.0071  | 0.0728  | 1.05        | 0.6603  | 0.5714  |
| 10-heptadecenoate (17:1n7) | 0.97                     | 0.7989  | 0.7880  | 0.95                       | 0.6700  | 0.9705  | 1.29        | 0.1961  | 0.3143  | 1.33        | 0.1234  | 0.2673  | 1.27        | 0.0879  | 0.2173  |
| stearate (18:0)            | 1.08                     | 0.5498  | 0.7495  | <b>1.23</b>                | 0.0418  | 0.4062  | <b>1.28</b> | 0.0134  | 0.0791  | <b>1.19</b> | 0.0559  | 0.1850  | 1.03        | 0.6393  | 0.5671  |
| oleate/vaccenate (18:1)    | 1.03                     | 0.8940  | 0.8133  | 1.17                       | 0.2521  | 0.7492  | 1.03        | 0.9699  | 0.6487  | 1.00        | 0.9238  | 0.6498  | 0.86        | 0.2678  | 0.3663  |
| nonadecanoate (19:0)       | 1.10                     | 0.2628  | 0.6093  | 0.99                       | 0.7696  | 0.9974  | <b>1.16</b> | 0.0723  | 0.2037  | 1.06        | 0.4866  | 0.5052  | <b>1.30</b> | 0.0379  | 0.1201  |
| 10-nonadecenoate (19:1n9)  | 1.01                     | 0.9550  | 0.8286  | 1.08                       | 0.4193  | 0.8624  | 1.10        | 0.4143  | 0.4615  | 1.09        | 0.4470  | 0.4886  | 1.19        | 0.9930  | 0.6453  |
| arachidate (20:0)          | 1.16                     | 0.1713  | 0.5510  | 1.15                       | 0.2485  | 0.7470  | 1.08        | 0.4377  | 0.4648  | 0.93        | 0.5482  | 0.5228  | <b>1.20</b> | 0.7021  | 0.5794  |
| eicosenoate (20:1)         | 1.00                     | 0.9832  | 0.8286  | <b>1.19</b>                | 0.0955  | 0.5202  | 1.03        | 0.9085  | 0.6399  | 1.03        | 0.8919  | 0.6438  | 1.00        | 0.1197  | 0.2495  |
| erucate (22:1n9)           | 0.99                     | 0.9724  | 0.8286  | 1.25                       | 0.1803  | 0.6510  | 1.15        | 0.5305  | 0.5089  | 1.16        | 0.5082  | 0.5113  | 1.14        | 0.4712  | 0.4869  |

### Supplementary Table S2a. Branched Fatty Acid and Dicarboxylate Metabolites in the

Cortex of Adolescent Female Rats

| Metabolites                | Nicotine (N) /saline (S) |         |         | Oral contraceptives (OC)/S |         |         | N + OC / S  |         |         | N + OC / N  |         |         | N + OC / OC |         |         |
|----------------------------|--------------------------|---------|---------|----------------------------|---------|---------|-------------|---------|---------|-------------|---------|---------|-------------|---------|---------|
|                            | N/S                      | p-value | q-value | OC/S                       | p-value | q-value | N+OC S      | p-value | q-value | N+OC/N      | p-value | q-value | N+OC/OC     | p-value | q-value |
| 15-methylpalmitate (i17:0) | 1.14                     | 0.2041  | 0.3907  | <b>1.35</b>                | 0.0046  | 0.0982  | <b>1.36</b> | 0.0033  | 0.0218  | <b>1.20</b> | 0.0792  | 0.8064  | 1.01        | 0.9059  | 0.7882  |
| 17-methylstearate (i19:0)  | 1.04                     | 0.6029  | 0.6677  | 1.13                       | 0.1783  | 0.5034  | 1.10        | 0.2835  | 0.3790  | 1.05        | 0.5779  | 0.9995  | 0.97        | 0.7802  | 0.7656  |
| dimethylmalonic acid       | 1.22                     | 0.3405  | 0.5058  | 1.01                       | 0.8424  | 0.7447  | 0.90        | 0.6954  | 0.6610  | 0.74        | 0.1809  | 0.8704  | 0.89        | 0.5554  | 0.7020  |
| glutarate (C5-DC)          | 0.83                     | 0.2065  | 0.3933  | 0.80                       | 0.1355  | 0.4374  | <b>0.74</b> | 0.0245  | 0.0854  | 0.90        | 0.3059  | 0.8898  | 0.92        | 0.4288  | 0.6672  |
| 2-hydroxyglutarate         | <b>1.25</b>              | 0.0816  | 0.2360  | 1.02                       | 0.6288  | 0.7094  | 1.02        | 0.7509  | 0.6792  | 0.82        | 0.1515  | 0.8704  | 1.00        | 0.8679  | 0.7834  |
| 2-hydroxyadipate           | <b>0.65</b>              | 0.0505  | 0.2051  | 0.90                       | 0.6835  | 0.7293  | 0.70        | 0.1087  | 0.2227  | 1.07        | 0.7136  | 0.9996  | 0.77        | 0.2274  | 0.5268  |
| 3-hydroxyadipate*          | 0.78                     | 0.1935  | 0.3858  | 0.98                       | 0.7248  | 0.7358  | 0.91        | 0.4136  | 0.4772  | 1.17        | 0.6244  | 0.9996  | 0.93        | 0.6402  | 0.7399  |
| maleate                    | 0.89                     | 0.2148  | 0.4002  | 0.98                       | 0.8446  | 0.7447  | 1.02        | 0.8589  | 0.7075  | 1.14        | 0.1573  | 0.8704  | 1.04        | 0.7087  | 0.7586  |
| 2-aminoheptanoate          | 1.04                     | 0.5214  | 0.6274  | 0.99                       | 0.7971  | 0.7438  | 1.48        | 0.2525  | 0.3601  | <b>1.43</b> | 0.0770  | 0.8064  | 1.50        | 0.1628  | 0.4946  |
| propionylcarnitine (C3)    | <b>1.51</b>              | 0.0090  | 0.0649  | <b>1.58</b>                | 0.0042  | 0.0982  | <b>1.64</b> | 0.0033  | 0.0218  | 1.09        | 0.7135  | 0.9996  | 1.04        | 0.9288  | 0.7902  |
| methylmalonate (MMA)       | 0.95                     | 0.6693  | 0.6981  | 1.09                       | 0.3567  | 0.5981  | 0.95        | 0.6657  | 0.6443  | 0.99        | 0.9961  | 0.9996  | 0.87        | 0.1781  | 0.4946  |

## Supplementary Table S2b. Branched Fatty Acid, Dicarboxylate, Amino and Metabolism in the Cortex of Adult Female Rats

| Metabolites                | Nicotine (N) /saline (S) |         |         | Oral contraceptives (OC)/S |         |         | N + OC / S  |         |         | N + OC / N  |         |         | N + OC / OC |         |         |
|----------------------------|--------------------------|---------|---------|----------------------------|---------|---------|-------------|---------|---------|-------------|---------|---------|-------------|---------|---------|
|                            | N/S                      | p-value | q-value | OC/S                       | p-value | q-value | N+/OC S     | p-value | q-value | N+OC/N      | p-value | q-value | N+OC/OC     | p-value | q-value |
| 15-methylpalmitate (i17:0) | 1.12                     | 0.2460  | 0.6063  | 1.12                       | 0.1968  | 0.6723  | <b>1.39</b> | 0.0092  | 0.0703  | 1.24        | 0.1324  | 0.2730  | 1.07        | 0.1691  | 0.2878  |
| 17-methylstearate (i19:0)  | 1.00                     | 0.8373  | 0.7973  | 1.03                       | 0.6312  | 0.9597  | <b>1.17</b> | 0.0525  | 0.1661  | <b>1.17</b> | 0.0814  | 0.2174  | 1.08        | 0.1398  | 0.2630  |
| dimethylmalonic acid       | 0.90                     | 0.5553  | 0.7495  | 0.90                       | 0.4925  | 0.8991  | 0.80        | 0.2087  | 0.3201  | 0.89        | 0.5004  | 0.5106  | 1.13        | 0.5636  | 0.5289  |
| glutamate (C5-DC)          | 0.88                     | 0.4406  | 0.6892  | 0.91                       | 0.5040  | 0.9000  | 0.92        | 0.5373  | 0.5111  | 1.05        | 0.8766  | 0.6394  | 1.03        | 0.9588  | 0.6387  |
| 2-hydroxyglutarate         | 0.89                     | 0.4700  | 0.6998  | 0.88                       | 0.5157  | 0.9061  | 0.97        | 0.9459  | 0.6454  | 1.09        | 0.4296  | 0.4825  | 1.03        | 0.4731  | 0.4869  |
| 2-hydroxyadipate           | 1.10                     | 0.2418  | 0.6036  | 0.67                       | 0.1911  | 0.6610  | 0.87        | 0.9416  | 0.6442  | 0.79        | 0.2720  | 0.3840  | 1.34        | 0.1879  | 0.2878  |
| 3-hydroxyadipate*          | 0.88                     | 0.5365  | 0.7494  | 0.93                       | 0.8289  | 0.9974  | 1.02        | 0.9965  | 0.6551  | 1.15        | 0.5394  | 0.5209  | 0.93        | 0.8323  | 0.5998  |
| maleate                    | <b>0.83</b>              | 0.0878  | 0.4469  | 0.84                       | 0.1082  | 0.5255  | 0.87        | 0.2217  | 0.3291  | 1.05        | 0.6177  | 0.5564  | <b>0.79</b> | 0.6932  | 0.5761  |
| 2-aminoheptanoate          | 1.56                     | 0.1163  | 0.4742  | <b>0.64</b>                | 0.0828  | 0.5019  | <b>2.37</b> | 0.0041  | 0.0430  | 1.45        | 0.1664  | 0.3049  | 1.20        | 0.0000  | 0.0004  |
| propionylcarnitine (C3)    | 0.81                     | 0.1312  | 0.4937  | 1.05                       | 0.9110  | 0.9974  | 0.90        | 0.3238  | 0.4050  | 1.10        | 0.5938  | 0.5428  | 1.15        | 0.2727  | 0.3695  |
| methylmalonate (MMA)       | 1.02                     | 0.6903  | 0.7747  | 1.08                       | 0.3952  | 0.8538  | 0.97        | 0.7657  | 0.5799  | 0.95        | 0.4869  | 0.5052  | 0.93        | 0.2525  | 0.3587  |

## Supplementary Table S3a. Acyl Carnitine Metabolism in the Cortex of Adolescent Female Rats

| Metabolites                                | Nicotine (N) /saline (S) |         |         | Oral contraceptives (OC)/S |         |         | N + OC / S  |         |         | N + OC / N  |         |         | N + OC / OC |         |         |
|--------------------------------------------|--------------------------|---------|---------|----------------------------|---------|---------|-------------|---------|---------|-------------|---------|---------|-------------|---------|---------|
|                                            | N/S                      | p-value | q-value | OC/S                       | p-value | q-value | N+/OC S     | p-value | q-value | N+OC/N      | p-value | q-value | N+OC/OC     | p-value | q-value |
| acetyl carnitine (C2)                      | <b>1.20</b>              | 0.0554  | 0.2144  | 1.13                       | 0.2069  | 0.5379  | <b>1.26</b> | 0.0159  | 0.0600  | 1.05        | 0.5977  | 0.9996  | 1.11        | 0.2314  | 0.5268  |
| 3-hydroxybutyrylcarnitine (1)              | 1.05                     | 0.7237  | 0.7256  | 0.86                       | 0.2639  | 0.5670  | 1.02        | 0.9931  | 0.7389  | 0.97        | 0.7303  | 0.9996  | 1.18        | 0.2603  | 0.5515  |
| 3-hydroxybutyrylcarnitine (2)              | 1.02                     | 0.6999  | 0.7167  | 0.95                       | 0.8115  | 0.7438  | 1.24        | 0.2404  | 0.3500  | 1.22        | 0.4276  | 0.9423  | 1.30        | 0.1593  | 0.4946  |
| lauryl carnitine (C12)                     | 0.97                     | 0.9741  | 0.7724  | 1.14                       | 0.4628  | 0.6427  | 1.14        | 0.3452  | 0.4253  | 1.18        | 0.3291  | 0.8898  | 1.00        | 0.8324  | 0.7751  |
| myristoylcarnitine (C14)                   | 0.98                     | 0.9376  | 0.7635  | 1.10                       | 0.4235  | 0.6161  | 1.15        | 0.2244  | 0.3388  | 1.17        | 0.2550  | 0.8871  | 1.04        | 0.6745  | 0.7439  |
| palmitoylcarnitine (C16)                   | 1.09                     | 0.5804  | 0.6564  | 1.11                       | 0.4293  | 0.6224  | <b>1.38</b> | 0.0188  | 0.0697  | <b>1.27</b> | 0.0676  | 0.8064  | 1.24        | 0.1101  | 0.4562  |
| palmitoleoylcarnitine (C16:1)*             | 1.06                     | 0.7830  | 0.7430  | 1.12                       | 0.5343  | 0.6764  | <b>1.37</b> | 0.0951  | 0.1980  | 1.29        | 0.1608  | 0.8704  | 1.22        | 0.2881  | 0.5746  |
| stearoylcarnitine (C18)                    | <b>1.26</b>              | 0.0641  | 0.2190  | <b>1.39</b>                | 0.0073  | 0.1303  | <b>1.44</b> | 0.0035  | 0.0228  | 1.14        | 0.2517  | 0.8871  | 1.04        | 0.7942  | 0.7675  |
| linoleoylcarnitine (C18:2)*                | 1.22                     | 0.2224  | 0.4066  | 1.12                       | 0.4782  | 0.6474  | <b>1.51</b> | 0.0102  | 0.0452  | 1.24        | 0.1596  | 0.8704  | <b>1.35</b> | 0.0568  | 0.3193  |
| oleoylcarnitine (C18:1)                    | 1.18                     | 0.3165  | 0.4782  | 1.21                       | 0.2483  | 0.5670  | <b>1.39</b> | 0.0537  | 0.1387  | 1.18        | 0.3414  | 0.8898  | 1.15        | 0.4249  | 0.6672  |
| myristoleoylcarnitine (C14:1)*             | 1.00                     | 0.9739  | 0.7724  | 1.13                       | 0.7259  | 0.7358  | 1.21        | 0.2943  | 0.3859  | 1.21        | 0.3094  | 0.8898  | 1.07        | 0.4830  | 0.6915  |
| arachidoylcarnitine (C20)*                 | 1.25                     | 0.1676  | 0.3609  | 0.95                       | 0.9667  | 0.7685  | 1.01        | 0.9041  | 0.7187  | 0.80        | 0.2068  | 0.8713  | 1.06        | 0.8712  | 0.7834  |
| arachidonoylcarnitine (C20:4)              | <b>1.27</b>              | 0.0022  | 0.0241  | <b>1.19</b>                | 0.0234  | 0.1907  | <b>1.34</b> | 0.0002  | 0.0034  | 1.06        | 0.4393  | 0.9444  | 1.13        | 0.1040  | 0.4562  |
| adrenoylcarnitine (C22:4)*                 | <b>1.54</b>              | 0.0325  | 0.1722  | 0.91                       | 0.6838  | 0.7293  | 1.24        | 0.2458  | 0.3542  | 0.81        | 0.3122  | 0.8898  | 1.36        | 0.1192  | 0.4562  |
| dihomo-linolenoylcarnitine (C20:3n3 or 6)* | <b>1.31</b>              | 0.0806  | 0.2346  | 1.07                       | 0.5584  | 0.6844  | <b>1.33</b> | 0.0613  | 0.1444  | 1.01        | 0.8966  | 0.9996  | 1.24        | 0.1918  | 0.5120  |
| dihomo-linoleoylcarnitine (C20:2)*         | <b>1.37</b>              | 0.0566  | 0.2144  | 1.00                       | 0.8660  | 0.7508  | <b>1.42</b> | 0.0284  | 0.0932  | 1.03        | 0.7627  | 0.9996  | <b>1.41</b> | 0.0188  | 0.1988  |
| eicosenoylcarnitine (C20:1)*               | <b>1.28</b>              | 0.0594  | 0.2189  | 1.20                       | 0.1349  | 0.4374  | <b>1.35</b> | 0.0288  | 0.0932  | 1.05        | 0.7503  | 0.9996  | 1.12        | 0.4703  | 0.6862  |
| erucoylcarnitine (C22:1)*                  | 1.36                     | 0.1293  | 0.3182  | 0.96                       | 0.9143  | 0.7613  | 0.99        | 0.9855  | 0.7360  | 0.73        | 0.1338  | 0.8704  | 1.03        | 0.8999  | 0.7882  |
| docosahexaenoylcarnitine (C22:6)*          | <b>1.26</b>              | 0.0408  | 0.1848  | <b>1.31</b>                | 0.0189  | 0.1762  | <b>1.57</b> | 0.0003  | 0.0039  | <b>1.24</b> | 0.0746  | 0.8064  | 1.20        | 0.1410  | 0.4740  |
| margaroylcarnitine (C17)*                  | 1.17                     | 0.3524  | 0.5199  | 1.09                       | 0.4124  | 0.6079  | <b>1.27</b> | 0.0555  | 0.1420  | 1.09        | 0.3131  | 0.8898  | 1.17        | 0.2634  | 0.5543  |
| pentadecanoylcarnitine (C15)*              | 1.04                     | 0.8762  | 0.7549  | 1.07                       | 0.5411  | 0.6827  | <b>1.33</b> | 0.0608  | 0.1441  | <b>1.28</b> | 0.0844  | 0.8302  | 1.24        | 0.1994  | 0.5120  |

## Supplementary Table S3b. Acyl Carnitine Metabolism in the Cortex of Adult Female

## Rats

| Metabolites                                | Nicotine (N) /saline (S) |         |         | Oral contraceptives (OC)/S |         |         | N + OC / S |         |         | N + OC / N |         |         | N + OC / OC |         |         |
|--------------------------------------------|--------------------------|---------|---------|----------------------------|---------|---------|------------|---------|---------|------------|---------|---------|-------------|---------|---------|
|                                            | N/S                      | p-value | q-value | OC/S                       | p-value | q-value | N+OC S     | p-value | q-value | N+OC/N     | p-value | q-value | N+OC/OC     | p-value | q-value |
| acetylcarnitine (C2)                       | 1.14                     | 0.1794  | 0.5637  | 0.99                       | 0.9545  | 0.9974  | 1.16       | 0.1095  | 0.2378  | 1.02       | 0.7906  | 0.6119  | 1.19        | 0.0978  | 0.2335  |
| 3-hydroxybutyrylcarnitine (1)              | 1.15                     | 0.2734  | 0.6199  | 0.68                       | 0.0092  | 0.1806  | 1.29       | 0.2070  | 0.3201  | 1.12       | 0.8651  | 0.6374  | 1.30        | 0.0002  | 0.0038  |
| 3-hydroxybutyrylcarnitine (2)              | 1.00                     | 0.7110  | 0.7749  | 0.56                       | 0.0078  | 0.1650  | 0.74       | 0.2366  | 0.3440  | 0.74       | 0.1224  | 0.2668  | 0.84        | 0.1235  | 0.2511  |
| laurylcarnitine (C12)                      | 0.93                     | 0.9491  | 0.8286  | 0.97                       | 0.8107  | 0.9974  | 0.73       | 0.1330  | 0.2679  | 0.79       | 0.1497  | 0.2843  | 1.10        | 0.0829  | 0.2092  |
| myristoylcarnitine (C14)                   | 0.88                     | 0.5780  | 0.7503  | 0.97                       | 0.9266  | 0.9974  | 0.79       | 0.1931  | 0.3143  | 0.90       | 0.4518  | 0.4924  | 1.05        | 0.1641  | 0.2862  |
| palmitoylcarnitine (C16)                   | 0.94                     | 0.9653  | 0.8286  | 0.93                       | 0.9526  | 0.9974  | 0.83       | 0.3934  | 0.4466  | 0.88       | 0.4177  | 0.4749  | 0.94        | 0.4269  | 0.4731  |
| palmitoleoylcarnitine (C16:1)*             | 0.86                     | 0.6720  | 0.7747  | 0.88                       | 0.9224  | 0.9974  | 0.72       | 0.1934  | 0.3143  | 0.83       | 0.3768  | 0.4567  | 0.81        | 0.2281  | 0.3367  |
| stearoylcarnitine (C18)                    | 1.04                     | 0.9461  | 0.8286  | 1.09                       | 0.4963  | 0.8991  | 1.30       | 0.0391  | 0.1423  | 1.24       | 0.0456  | 0.1571  | 1.04        | 0.1590  | 0.2827  |
| linoleoylcarnitine (C18:2)*                | 1.09                     | 0.4916  | 0.7142  | 0.99                       | 0.9105  | 0.9974  | 1.31       | 0.0890  | 0.2167  | 1.20       | 0.3035  | 0.4051  | 1.13        | 0.1113  | 0.2376  |
| oleoylcarnitine (C18:1)                    | 0.92                     | 0.9478  | 0.8286  | 0.92                       | 0.9178  | 0.9974  | 0.77       | 0.3488  | 0.4220  | 0.83       | 0.3832  | 0.4602  | 0.82        | 0.2989  | 0.3853  |
| myristoleoylcarnitine (C14:1)*             | 0.79                     | 0.4990  | 0.7173  | 0.86                       | 0.8785  | 0.9974  | 0.68       | 0.1022  | 0.2319  | 0.86       | 0.3307  | 0.4246  | 0.91        | 0.1372  | 0.2595  |
| arachidoylcarnitine (C20)*                 | 1.19                     | 0.4123  | 0.6667  | 0.83                       | 0.2939  | 0.7878  | 1.06       | 0.7543  | 0.5773  | 0.89       | 0.6111  | 0.5533  | 0.95        | 0.1749  | 0.2921  |
| arachidonoylcarnitine (C20:4)              | 1.02                     | 0.6787  | 0.7747  | 0.95                       | 0.5488  | 0.9303  | 1.07       | 0.3607  | 0.4274  | 1.04       | 0.6154  | 0.5556  | 1.01        | 0.1329  | 0.2555  |
| adrenoylcarnitine (C22:4)*                 | 1.37                     | 0.0813  | 0.4366  | 0.72                       | 0.1724  | 0.6338  | 1.03       | 0.5815  | 0.5240  | 0.75       | 0.2272  | 0.3546  | 0.81        | 0.0578  | 0.1646  |
| dihomo-linolenoylcarnitine (C20:3n3 or 6)* | 1.14                     | 0.2881  | 0.6242  | 0.75                       | 0.1524  | 0.5946  | 1.01       | 0.6433  | 0.5354  | 0.89       | 0.5464  | 0.5228  | 0.89        | 0.0604  | 0.1679  |
| dihomo-linoleoylcarnitine (C20:2)*         | 1.07                     | 0.6028  | 0.7606  | 0.96                       | 0.7945  | 0.9974  | 1.38       | 0.0460  | 0.1536  | 1.29       | 0.1349  | 0.2739  | 1.00        | 0.0251  | 0.0938  |
| eicosenoylcarnitine (C20:1)*               | 1.02                     | 0.8648  | 0.8043  | 0.92                       | 0.7645  | 0.9974  | 1.03       | 0.6366  | 0.5354  | 1.02       | 0.7622  | 0.6057  | 0.95        | 0.4409  | 0.4819  |
| erucoylcarnitine (C22:1)*                  | 1.17                     | 0.3242  | 0.6405  | 0.87                       | 0.5578  | 0.9353  | 0.88       | 0.7013  | 0.5556  | 0.76       | 0.1730  | 0.3087  | 0.88        | 0.8390  | 0.6005  |
| docosahexaenoylcarnitine (C22:6)*          | 1.01                     | 0.9810  | 0.8286  | 0.97                       | 0.6676  | 0.9705  | 1.14       | 0.2574  | 0.3596  | 1.13       | 0.2477  | 0.3679  | 1.04        | 0.1207  | 0.2495  |
| margaroylcarnitine (C17)*                  | 0.98                     | 0.9840  | 0.8286  | 1.08                       | 0.5018  | 0.8991  | 1.01       | 0.7304  | 0.5650  | 1.04       | 0.7154  | 0.5976  | 1.01        | 0.7429  | 0.5885  |
| pentadecanoylcarnitine (C15)*              | 0.95                     | 0.9103  | 0.8161  | 0.88                       | 0.5633  | 0.9388  | 0.86       | 0.5494  | 0.5113  | 0.91       | 0.6267  | 0.5629  | 1.12        | 0.9835  | 0.6438  |

**Supplementary Table S4a.** Carnitine Metabolism, Ketone Bodies, Acetylcholine, Acyl Choline, and Monohydroxy Metabolites in the Cortex of Adolescent Female Rats

| Metabolites              | Nicotine (N) /saline (S) |         |         | Oral contraceptives (OC)/S |         |         | N + OC / S |         |         | N + OC / N |         |         | N + OC / OC |         |         |
|--------------------------|--------------------------|---------|---------|----------------------------|---------|---------|------------|---------|---------|------------|---------|---------|-------------|---------|---------|
|                          | N/S                      | p-value | q-value | OC/S                       | p-value | q-value | N+OC S     | p-value | q-value | N+OC/N     | p-value | q-value | N+OC/OC     | p-value | q-value |
| deoxycarnitine           | 1.02                     | 0.8501  | 0.7502  | 0.96                       | 0.6170  | 0.7087  | 1.10       | 0.2913  | 0.3837  | 1.08       | 0.3851  | 0.9209  | 1.14        | 0.1225  | 0.4611  |
| carnitine                | 1.22                     | 0.0089  | 0.0649  | 1.08                       | 0.3013  | 0.5904  | 1.28       | 0.0040  | 0.0254  | 1.03       | 0.7740  | 0.9996  | 1.16        | 0.0556  | 0.3193  |
| 3-hydroxybutyrate (BHBA) | 0.82                     | 0.2011  | 0.3887  | 0.61                       | 0.0013  | 0.0600  | 0.68       | 0.0072  | 0.0352  | 0.82       | 0.1398  | 0.8704  | 1.10        | 0.5530  | 0.7020  |
| acetylcholine            | 1.17                     | 0.0484  | 0.2023  | 1.23                       | 0.0087  | 0.1314  | 1.46       | 0.0000  | 0.0002  | 1.25       | 0.0041  | 0.3383  | 1.19        | 0.0254  | 0.2133  |
| docosahexaenoylcholine   | 1.09                     | 0.3694  | 0.5286  | 1.11                       | 0.2703  | 0.5696  | 1.01       | 0.8649  | 0.7096  | 0.92       | 0.4660  | 0.9444  | 0.91        | 0.3500  | 0.6254  |
| 2-hydroxylignocerate*    | 1.49                     | 0.0684  | 0.2207  | 1.14                       | 0.5473  | 0.6827  | 1.71       | 0.0051  | 0.0298  | 1.15       | 0.2952  | 0.8898  | 1.50        | 0.0246  | 0.2106  |
| 2-hydroxynervonate*      | 1.33                     | 0.0804  | 0.2346  | 1.56                       | 0.0166  | 0.1706  | 1.23       | 0.1802  | 0.3036  | 0.93       | 0.6733  | 0.9996  | 0.79        | 0.2710  | 0.5599  |
| 13-HODE + 9-HODE         | 1.36                     | 0.9486  | 0.7681  | 1.52                       | 0.3252  | 0.5969  | 1.28       | 0.7167  | 0.6646  | 0.94       | 0.7653  | 0.9996  | 0.84        | 0.5327  | 0.7020  |

**Supplementary Table S4b.** Carnitine Metabolism, Ketone Bodies, Acetylcholine, Acyl Choline, and Monohydroxy Metabolites in the Cortex of Adult Female Rats

| Metabolites              | Nicotine (N) /saline (S) |         |         | Oral contraceptives (OC)/S |         |         | N + OC / S |         |         | N + OC / N |         |         | N + OC / OC |         |         |
|--------------------------|--------------------------|---------|---------|----------------------------|---------|---------|------------|---------|---------|------------|---------|---------|-------------|---------|---------|
|                          | N/S                      | p-value | q-value | OC/S                       | p-value | q-value | N+OC S     | p-value | q-value | N+OC/N     | p-value | q-value | N+OC/OC     | p-value | q-value |
| deoxycarnitine           | 0.94                     | 0.5563  | 0.7495  | 0.97                       | 0.7241  | 0.9974  | 0.96       | 0.6417  | 0.5354  | 1.02       | 0.9018  | 0.6438  | 0.82        | 0.9103  | 0.6227  |
| carnitine                | 1.09                     | 0.2206  | 0.5988  | 0.92                       | 0.3192  | 0.8060  | 1.13       | 0.0959  | 0.2258  | 1.03       | 0.6509  | 0.5750  | 1.02        | 0.0092  | 0.0493  |
| 3-hydroxybutyrate (BHBA) | 1.03                     | 0.7932  | 0.7878  | 0.65                       | 0.0037  | 0.1261  | 1.27       | 0.2784  | 0.3816  | 1.24       | 0.4095  | 0.4695  | 1.68        | 0.0001  | 0.0026  |
| acetylcholine            | 1.07                     | 0.3867  | 0.6503  | 1.08                       | 0.3537  | 0.8437  | 1.36       | 0.0001  | 0.0033  | 1.28       | 0.0020  | 0.0369  | 1.27        | 0.0024  | 0.0186  |
| docosahexaenoylcholine   | 0.90                     | 0.5085  | 0.7254  | 1.08                       | 0.4056  | 0.8565  | 0.85       | 0.1876  | 0.3143  | 0.94       | 0.5065  | 0.5112  | 1.11        | 0.0341  | 0.1109  |
| 2-hydroxylignocerate*    | 1.09                     | 0.5788  | 0.7503  | 1.70                       | 0.0179  | 0.2887  | 0.98       | 0.9520  | 0.6461  | 0.90       | 0.5384  | 0.5209  | 0.53        | 0.0154  | 0.0688  |
| 2-hydroxynervonate*      | 1.12                     | 0.6219  | 0.7616  | 1.30                       | 0.1881  | 0.6547  | 1.23       | 0.3963  | 0.4478  | 1.10       | 0.7209  | 0.5983  | 1.04        | 0.6348  | 0.5671  |
| 13-HODE + 9-HODE         | 1.16                     | 0.7652  | 0.7749  | 1.01                       | 0.9535  | 0.9974  | 0.90       | 0.9667  | 0.6487  | 0.78       | 0.7972  | 0.6131  | 0.71        | 0.9868  | 0.6440  |

**Supplementary Table S5a.** Phosphatidylcholine (PC) Concentrations Metabolites in the Cortex of Adolescent Female Rats

| Metabolites                                             | Nicotine (N) /saline (S) |         |         | Oral contraceptives (OC)/S |         |         | N + OC / S |         |         | N + OC / N |         |         | N + OC / OC |         |         |
|---------------------------------------------------------|--------------------------|---------|---------|----------------------------|---------|---------|------------|---------|---------|------------|---------|---------|-------------|---------|---------|
|                                                         | N/S                      | p-value | q-value | OC/S                       | p-value | q-value | N+OC S     | p-value | q-value | N+OC/N     | p-value | q-value | N+OC/OC     | p-value | q-value |
| 1-myristoyl-2-palmitoyl-GPC (14:0/16:0)                 | 1.08                     | 0.4072  | 0.5622  | 1.05                       | 0.6514  | 0.7123  | 1.13       | 0.1839  | 0.3036  | 1.05       | 0.6119  | 0.9996  | 1.07        | 0.3768  | 0.6437  |
| 1-myristoyl-2-arachidonoyl-GPC (14:0/20:4)*             | 1.27                     | 0.0379  | 0.1754  | 1.01                       | 0.7183  | 0.7358  | 1.15       | 0.1243  | 0.2407  | 0.91       | 0.5735  | 0.9995  | 1.14        | 0.2360  | 0.5296  |
| 1,2-dipalmitoyl-GPC (16:0/16:0)                         | 1.00                     | 0.9218  | 0.7628  | 1.04                       | 0.6439  | 0.7094  | 1.11       | 0.1910  | 0.3055  | 1.10       | 0.2257  | 0.8784  | 1.07        | 0.3941  | 0.6526  |
| 1-palmitoyl-2-palmitoleoyl-GPC (16:0/16:1)*             | 1.11                     | 0.2122  | 0.3974  | 1.08                       | 0.3372  | 0.5969  | 1.24       | 0.0162  | 0.0605  | 1.13       | 0.2284  | 0.8784  | 1.15        | 0.1362  | 0.4715  |
| 1-palmitoyl-2-stearoyl-GPC (16:0/18:0)                  | 1.01                     | 0.9359  | 0.7635  | 1.04                       | 0.8609  | 0.7479  | 1.07       | 0.6309  | 0.6255  | 1.06       | 0.6889  | 0.9996  | 1.03        | 0.7599  | 0.7656  |
| 1-palmitoyl-2-oleoyl-GPC (16:0/18:1)                    | 1.07                     | 0.2313  | 0.4066  | 1.13                       | 0.0303  | 0.2097  | 1.17       | 0.0083  | 0.0394  | 1.09       | 0.1329  | 0.8704  | 1.03        | 0.6103  | 0.7328  |
| 1-palmitoyl-2-linoleoyl-GPC (16:0/18:2)                 | 1.22                     | 0.0456  | 0.1999  | 1.16                       | 0.1748  | 0.4968  | 1.35       | 0.0043  | 0.0261  | 1.10       | 0.3545  | 0.8917  | 1.16        | 0.1145  | 0.4562  |
| 1-palmitoyl-2-dihomo-linolenoyl-GPC (16:0/20:3n3 or 6)* | 0.92                     | 0.5085  | 0.6253  | 1.04                       | 0.8760  | 0.7515  | 0.94       | 0.5119  | 0.5493  | 1.02       | 0.9957  | 0.9996  | 0.91        | 0.4175  | 0.6672  |
| 1-palmitoyl-2-arachidonoyl-GPC (16:0/20:4n6)            | 1.12                     | 0.0648  | 0.2190  | 1.07                       | 0.2387  | 0.5634  | 1.14       | 0.0263  | 0.0898  | 1.02       | 0.6917  | 0.9996  | 1.07        | 0.2798  | 0.5732  |
| 1-palmitoyl-2-docosahexaenoyl-GPC (16:0/22:6)           | 1.12                     | 0.1651  | 0.3591  | 1.19                       | 0.0293  | 0.2097  | 1.24       | 0.0084  | 0.0394  | 1.11       | 0.1904  | 0.8704  | 1.04        | 0.6227  | 0.7351  |
| 1-stearoyl-2-oleoyl-GPC (18:0/18:1)                     | 1.02                     | 0.7250  | 0.7256  | 1.18                       | 0.1945  | 0.5217  | 1.07       | 0.4809  | 0.5300  | 1.04       | 0.7232  | 0.9996  | 0.90        | 0.5486  | 0.7020  |
| 1-stearoyl-2-arachidonoyl-GPC (18:0/20:4)               | 1.06                     | 0.4895  | 0.6188  | 1.06                       | 0.5681  | 0.6872  | 1.13       | 0.1588  | 0.2780  | 1.07       | 0.4670  | 0.9444  | 1.07        | 0.3969  | 0.6526  |
| 1-stearoyl-2-docosahexaenoyl-GPC (18:0/22:6)            | 1.17                     | 0.2389  | 0.4183  | 1.23                       | 0.0984  | 0.3843  | 1.25       | 0.0809  | 0.1764  | 1.07       | 0.5596  | 0.9936  | 1.02        | 0.9231  | 0.7902  |
| 1-oleoyl-2-linoleoyl-GPC (18:1/18:2)*                   | 1.20                     | 0.0827  | 0.2376  | 1.17                       | 0.1282  | 0.4266  | 1.37       | 0.0024  | 0.0191  | 1.15       | 0.1648  | 0.8704  | 1.17        | 0.1086  | 0.4562  |
| 1-oleoyl-2-docosahexaenoyl-GPC (18:1/22:6)*             | 1.13                     | 0.1621  | 0.3558  | 1.26                       | 0.0078  | 0.1314  | 1.20       | 0.0327  | 0.0987  | 1.07       | 0.4423  | 0.9444  | 0.95        | 0.5720  | 0.7078  |
| 1,2-dilinoleoyl-GPC (18:2/18:2)                         | 1.18                     | 0.3098  | 0.4782  | 1.01                       | 0.8563  | 0.7470  | 1.18       | 0.2548  | 0.3608  | 1.00       | 0.9005  | 0.9996  | 1.17        | 0.1881  | 0.5120  |
| 1-linoleoyl-2-arachidonoyl-GPC (18:2/20:4n6)*           | 1.19                     | 0.1432  | 0.3335  | 1.09                       | 0.4365  | 0.6266  | 1.18       | 0.1470  | 0.2606  | 0.99       | 0.9887  | 0.9996  | 1.08        | 0.4950  | 0.6934  |

**Supplementary Table S5b.** Phosphatidylcholine (PC) Concentrations Metabolites in the Cortex of Adult Female Rats

| Metabolites                                             | Nicotine (N) /saline (S) |         |         | Oral contraceptives (OC)/S |         |         | N + OC / S |         |         | N + OC / N |         |         | N + OC / OC |         |         |
|---------------------------------------------------------|--------------------------|---------|---------|----------------------------|---------|---------|------------|---------|---------|------------|---------|---------|-------------|---------|---------|
|                                                         | N/S                      | p-value | q-value | OC/S                       | p-value | q-value | N+OC S     | p-value | q-value | N+OC/N     | p-value | q-value | N+OC/OC     | p-value | q-value |
| 1-myristoyl-2-palmitoyl-GPC (14:0/16:0)                 | 0.95                     | 0.6436  | 0.7735  | 1.07                       | 0.3708  | 0.8437  | 1.08       | 0.3735  | 0.4369  | 1.14       | 0.1785  | 0.3132  | 0.89        | 0.9960  | 0.6453  |
| 1-myristoyl-2-arachidonoyl-GPC (14:0/20:4)*             | 1.13                     | 0.3186  | 0.6405  | 1.12                       | 0.2823  | 0.7878  | 1.39       | 0.0083  | 0.0676  | 1.23       | 0.0887  | 0.2253  | 0.96        | 0.1039  | 0.2369  |
| 1,2-dipalmitoyl-GPC (16:0/16:0)                         | 0.92                     | 0.4356  | 0.6837  | 0.97                       | 0.9330  | 0.9974  | 1.06       | 0.3193  | 0.4040  | 1.15       | 0.0788  | 0.2152  | 0.99        | 0.2807  | 0.3739  |
| 1-palmitoyl-2-palmitoleoyl-GPC (16:0/16:1)*             | 0.95                     | 0.6174  | 0.7613  | 1.02                       | 0.7195  | 0.9942  | 1.17       | 0.1055  | 0.2347  | 1.23       | 0.0361  | 0.1507  | 0.97        | 0.2043  | 0.3186  |
| 1-palmitoyl-2-stearoyl-GPC (16:0/18:0)                  | 0.78                     | 0.0503  | 0.4037  | 0.92                       | 0.6341  | 0.9597  | 0.98       | 0.9554  | 0.6461  | 1.26       | 0.0444  | 0.1543  | 0.93        | 0.5949  | 0.5426  |
| 1-palmitoyl-2-oleoyl-GPC (16:0/18:1)                    | 0.96                     | 0.4283  | 0.6792  | 1.01                       | 0.7396  | 0.9974  | 1.11       | 0.0617  | 0.1870  | 1.16       | 0.0090  | 0.0795  | 1.06        | 0.1215  | 0.2498  |
| 1-palmitoyl-2-linoleoyl-GPC (16:0/18:2)                 | 0.98                     | 0.8380  | 0.7973  | 1.02                       | 0.6965  | 0.9862  | 1.50       | 0.0002  | 0.0055  | 1.53       | 0.0001  | 0.0077  | 1.27        | 0.0009  | 0.0094  |
| 1-palmitoyl-2-dihomo-linolenoyl-GPC (16:0/20:3n3 or 6)* | 0.77                     | 0.0958  | 0.4634  | 0.92                       | 0.8899  | 0.9974  | 1.42       | 0.0108  | 0.0763  | 1.84       | 0.0001  | 0.0045  | 1.64        | 0.0074  | 0.0420  |
| 1-palmitoyl-2-arachidonoyl-GPC (16:0/20:4n6)            | 0.97                     | 0.5675  | 0.7503  | 1.03                       | 0.6335  | 0.9597  | 1.15       | 0.0221  | 0.1034  | 1.18       | 0.0049  | 0.0600  | 1.03        | 0.0661  | 0.1772  |
| 1-palmitoyl-2-docosahexaenoyl-GPC (16:0/22:6)           | 0.99                     | 0.8722  | 0.8043  | 1.07                       | 0.3556  | 0.8437  | 1.22       | 0.0161  | 0.0892  | 1.23       | 0.0106  | 0.0832  | 1.07        | 0.1266  | 0.2531  |
| 1-stearoyl-2-oleoyl-GPC (18:0/18:1)                     | 0.80                     | 0.0525  | 0.4037  | 1.00                       | 0.9573  | 0.9974  | 0.96       | 0.6324  | 0.5354  | 1.19       | 0.1392  | 0.2757  | 1.07        | 0.5949  | 0.5426  |
| 1-stearoyl-2-arachidonoyl-GPC (18:0/20:4)               | 0.86                     | 0.0891  | 0.4469  | 1.01                       | 0.8632  | 0.9974  | 1.09       | 0.3259  | 0.4050  | 1.26       | 0.0086  | 0.0795  | 1.01        | 0.4168  | 0.4718  |
| 1-stearoyl-2-docosahexaenoyl-GPC (18:0/22:6)            | 0.88                     | 0.2709  | 0.6199  | 1.01                       | 0.7777  | 0.9974  | 1.21       | 0.0941  | 0.2233  | 1.37       | 0.0067  | 0.0728  | 1.20        | 0.1614  | 0.2856  |
| 1-oleoyl-2-linoleoyl-GPC (18:1/18:2)*                   | 0.93                     | 0.5718  | 0.7503  | 1.07                       | 0.4472  | 0.8816  | 1.44       | 0.0009  | 0.0166  | 1.54       | 0.0002  | 0.0081  | 1.14        | 0.0085  | 0.0468  |
| 1-oleoyl-2-docosahexaenoyl-GPC (18:1/22:6)*             | 0.96                     | 0.6513  | 0.7747  | 1.09                       | 0.2664  | 0.7631  | 1.24       | 0.0103  | 0.0756  | 1.28       | 0.0029  | 0.0492  | 1.14        | 0.1308  | 0.2555  |
| 1,2-dilinoleoyl-GPC (18:2/18:2)                         | 1.02                     | 0.9059  | 0.8161  | 1.01                       | 0.9093  | 0.9974  | 1.41       | 0.0185  | 0.0941  | 1.38       | 0.0247  | 0.1263  | 0.97        | 0.0244  | 0.0934  |
| 1-linoleoyl-2-arachidonoyl-GPC (18:2/20:4n6)*           | 1.05                     | 0.8883  | 0.8043  | 1.10                       | 0.3779  | 0.8437  | 1.69       | 0.0001  | 0.0029  | 1.61       | 0.0002  | 0.0085  | 1.27        | 0.0018  | 0.0158  |

**Supplementary Tables S1-5:** The tables shows fold-change of the specified metabolites in the cortexes of (a) adolescent and (b) adult rats; the red colored boxes represent a significant increase ( $p \leq 0.05$ ) in that metabolite, the pink boxes represent a narrowly missed statistical cutoff for significant increase  $0.05 < p < 0.10$ , the green colored boxes represent a significant decrease ( $p \leq 0.05$ ) in that metabolite, and the light green colored boxes represent a narrowly missed statistical cutoff for significant decrease in that metabolite  $0.05 < p < 0.10$ . "Biochemical name\*" indicates a compound that has not been confirmed based on a standard, but Metabolon is confident in its identity.
